1 **Title:**

2 **Pathological and metabolic underpinnings of energetic inefficiency in**  
3 **temporal lobe epilepsy**

4  
5 Xiaosong He<sup>1,2,\*</sup>, Lorenzo Caciagli<sup>2</sup>, Linden Parkes<sup>2</sup>, Jennifer Stiso<sup>2</sup>, Teresa M. Karrer<sup>3</sup>, Jason Z.  
6 Kim<sup>2</sup>, Zhixin Lu<sup>2</sup>, Tommaso Menara<sup>4</sup>, Fabio Pasqualetti<sup>4</sup>, Michael R. Sperling<sup>5</sup>, Joseph I. Tracy<sup>5</sup>,  
7 Dani S. Bassett<sup>2,6,7,8,9,10,\*</sup>

8  
9 <sup>1</sup> Department of Psychology, School of Humanities and Social Sciences, University of Science  
10 and Technology of China, Hefei, Anhui, China

11 <sup>2</sup> Department of Bioengineering, University of Pennsylvania, Philadelphia, Pennsylvania, USA

12 <sup>3</sup> Personalized Health Care, Product Development, F. Hoffmann-La Roche Ltd., Basel,  
13 Switzerland.

14 <sup>4</sup> Department of Mechanical Engineering, University of California, Riverside, California, USA

15 <sup>5</sup> Department of Neurology, Thomas Jefferson University, Philadelphia, Pennsylvania, USA

16 <sup>6-9</sup> Departments of Electrical & Systems Engineering, Physics & Astronomy, Psychiatry, and  
17 Neurology, University of Pennsylvania, Philadelphia, Pennsylvania, USA

18 <sup>10</sup> Santa Fe Institute, Santa Fe, New Mexico, USA

19 \* Correspondence to the below authors:

20 Dr. Xiaosong He: [hexs@ustc.edu.cn](mailto:hexs@ustc.edu.cn)

21 Dr. Dani S. Bassett: [dsb@seas.upenn.edu](mailto:dsb@seas.upenn.edu)

## 22 **Abstract**

23       The human brain consumes a disproportionate amount of energy to generate neural  
24 dynamics. Yet precisely how energetic processes are altered in neurological disorders remains  
25 far from understood. Here, we use network control theory to profile the brain's energy landscape,  
26 describing the rich dynamical repertoire supported by the structural connectome. This approach  
27 allows us to estimate the energy required to activate a circuit, and determine which regions most  
28 support that activation. Focusing on temporal lobe epilepsy (TLE), we show that patients require  
29 more control energy to activate the limbic network than healthy volunteers, especially ipsilateral  
30 to the seizure focus. Further, greater energetic costs are largely localized to the ipsilateral  
31 temporo-limbic regions. Importantly, the energetic imbalance between ipsilateral and  
32 contralateral temporo-limbic regions is tracked by asymmetric metabolic patterns, which in turn  
33 are explained by asymmetric gray matter volume loss. In TLE, failure to meet the extra energy  
34 demands may lead to suboptimal brain dynamics and inadequate activation. Broadly, our  
35 investigation provides a theoretical framework unifying gray matter integrity, local metabolism,  
36 and energetic generation of neural dynamics.

## 37 **Main**

38       Human brain function emerges from continuous neural dynamics that give rise to diverse  
39 activation states and rich rules for transitioning between states<sup>1-5</sup>. Those dynamics pose marked  
40 energetic demands, consuming 20% of the body's energy while comprising merely 2% of the  
41 body's weight<sup>6</sup>. Pathological disruptions to healthy neural dynamics and their energetic sequelae,  
42 as observed in neurological and psychiatric diseases, can have devastating consequences for  
43 cognitive function and behavior. One prototypical example is epileptic seizures, which are  
44 transient periods of pathological hypersynchronous neuronal activities<sup>7</sup>. Seizures consume  
45 significant energy and instantly disrupt ongoing brain dynamics, causing marked behavioral  
46 disturbances<sup>8,9</sup>. Despite their transience, the impact of seizures on brain function can linger well  
47 beyond seizure termination, especially in patients with drug-resistant focal epilepsy, such as  
48 temporal lobe epilepsy (TLE). Neuropsychological assessments performed during the interictal  
49 period, *i.e.*, when patients are not suffering from seizures, reveal persistent deficits in multiple  
50 cognitive and affective domains<sup>10-13</sup>, indicating the presence of prolonged disruptions to normal  
51 brain dynamics. Little is known about this pervasive neural dysfunction throughout the vast  
52 temporal epochs between seizures, its relation to brain energetics, and its potential dependence  
53 upon the brain's structural backbone.

54       TLE is marked by widespread alterations in brain structure, which—importantly—extends  
55 beyond the seizure foci<sup>14-16</sup>. Concordantly, epileptogenic regions evince persistent  
56 hypometabolism during interictal periods<sup>17</sup>. The severity of both structural damage and  
57 hypometabolism is associated with cognitive decline in TLE patients<sup>18-20</sup>, suggesting that chronic  
58 neural dysfunction might be rooted in a reduced baseline metabolism underpinned by  
59 compromised structural integrity. Regional hypometabolism could hamper the attainment and  
60 maintenance of healthy activation levels, in turn decrementing the brain's dynamic repertoire and

61 clamping cognitive function. Examples of such altered dynamics in TLE abound, spanning  
62 reduced language network flexibility (*i.e.*, fewer state transitions)<sup>21</sup>, reduced memory network  
63 flexibility<sup>22</sup>, delayed information flow, and slower activation spreading times<sup>23</sup>. Despite these  
64 pervasive alterations in dynamics, metabolism, and structure, little is known about the  
65 mechanistic relationships between them.

66 To formally assess how damage to structural connectivity disrupts energetic generation of  
67 brain dynamics, we use network control theory (NCT), a powerful approach from systems  
68 engineering typically deployed to design and manage technological, robotic, and communication  
69 systems. NCT allows us to evaluate the energetic cost of brain states—and transitions between  
70 them—as a function of the underlying network architecture. We begin by stipulating a dynamical  
71 model whereby activity is constrained to spread along structural connections (**Figure 1a**). Using  
72 this model, we can quantify the control energy required to move between any two states or  
73 patterns of activity<sup>24</sup>. Prior work has shown that the control energy required to transition between  
74 states varies with cognitive demand<sup>25</sup>, decreases over development<sup>26</sup>, and is altered in psychiatric  
75 disorders<sup>27,28</sup>. Prior studies have also demonstrated that control energy can be causally  
76 manipulated by brain stimulation<sup>29</sup> and antipsychotic medication<sup>25</sup>. These efforts lay important  
77 groundwork for our use of NCT to model the structurally-constrained energetic processes of  
78 brain state transitions in patients with TLE, by supporting its feasibility, ensuring its  
79 methodological rigor, and underscoring its biological relevance.

80 Although a generic artificial system could hypothetically visit any activation state, evidence  
81 suggests that the brain preferentially visits some states more often than others<sup>4,30,31</sup>. These  
82 preferential states can be defined by the co-activation of regions that are functionally coupled at  
83 rest<sup>32,33</sup>. Such so-called *intrinsic connectivity networks* (ICNs) can also be detected during task  
84 performance, and have been shown to support a range of cognitive processes<sup>32,34,35</sup>. Here, we  
85 study the efficient attainment of eight such preferential states<sup>33,36</sup>, whereby only regions in a  
86 given ICN are active (**Figure 1b**). Then, we use NCT to simulate transitions among preferential  
87 states and to estimate the associated energy costs, thereby probing the brain's efficiency and  
88 integrity in the presence of TLE. Our simulations evaluate two transition types: (1) *reaching*  
89 *transitions*, where the brain moves from a theoretical baseline to a preferential state (**Figure 1c**);  
90 and (2) *switching transitions*, where the brain moves between two preferential states (**Figure**  
91 **1d**). By estimating the control energy for *reaching transitions*, we determine which preferential  
92 states are difficult to reach; that determination informs our understanding of the ICNs impacted  
93 by TLE. Subsequently, we compute control energy for *switching transitions*, which allows us to  
94 identify the regions that tend to carry the greatest energetic burdens in supporting the brain's  
95 dynamical repertoire.

96 After using NCT to unravel the energetic basis of brain dysfunction in TLE, we next dig  
97 deeper into the neurophysiological underpinnings of control energy. In the absence of any  
98 external input to the brain (*e.g.*, brain stimulation), control energy is thought to track the cost of  
99 endogenous resources associated with internal cognitive demand<sup>25,37</sup>. However, there is as yet no  
100 precise evidence linking this metric to a direct readout of such resources. Here we provide

101 exactly such evidence. As part of presurgical evaluation in patients with TLE,  
102 fluorodeoxyglucose (FDG)-PET is commonly performed interictally to measure baseline  
103 metabolic levels. Leveraging this additional piece of information, we can verify whether regions  
104 that show altered energetic efficiency in facilitating brain state transitions also present with  
105 metabolic anomalies. Moreover, we can determine how both the theoretical and empirical  
106 measures of energy costs are related to the underlying structural integrity of those regions.

107 In this study, we enrolled 60 TLE patients and 50 demographically matched healthy controls  
108 (HCs) (**Table 1**), who underwent an MRI scanning session including both a high angular  
109 resolution diffusion imaging (HARDI) scan and a T1-weighted (T1w) anatomical scan. Among  
110 the enrolled patients, 50 also received an FDG-PET scan as part of their presurgical evaluation.  
111 From each participant's HARDI data, we generated a structural connectome and estimated the  
112 control energy required to perform all *reaching* and *switching transitions*. Then, we tested for  
113 energetic deficiencies in TLE by comparing control energy between patients and HCs. We  
114 showed that TLE patients present with an energetic deficiency in reaching a preferential state  
115 predominantly comprised of limbic regions. This deficiency was due to excessive energy costs  
116 associated with activating the limbic network ipsilateral to the patient's seizure focus. When  
117 considering *switching transitions*, we found that the mesial and inferior parts of the ipsilateral  
118 temporal lobe demanded greater energy consumption in TLE than in HCs. These increased costs  
119 of regulating brain dynamics incurred by TLE patients limit their capacity to activate and  
120 maintain desired brain states, potentially leading to dysfunction. Furthermore, we found that this  
121 energetic imbalance between ipsilateral mesial and inferior temporal regions and their  
122 contralateral counterparts were accompanied by similar asymmetries in metabolic patterns, both  
123 of which are rooted in a corresponding asymmetry of underlying gray matter volume loss.

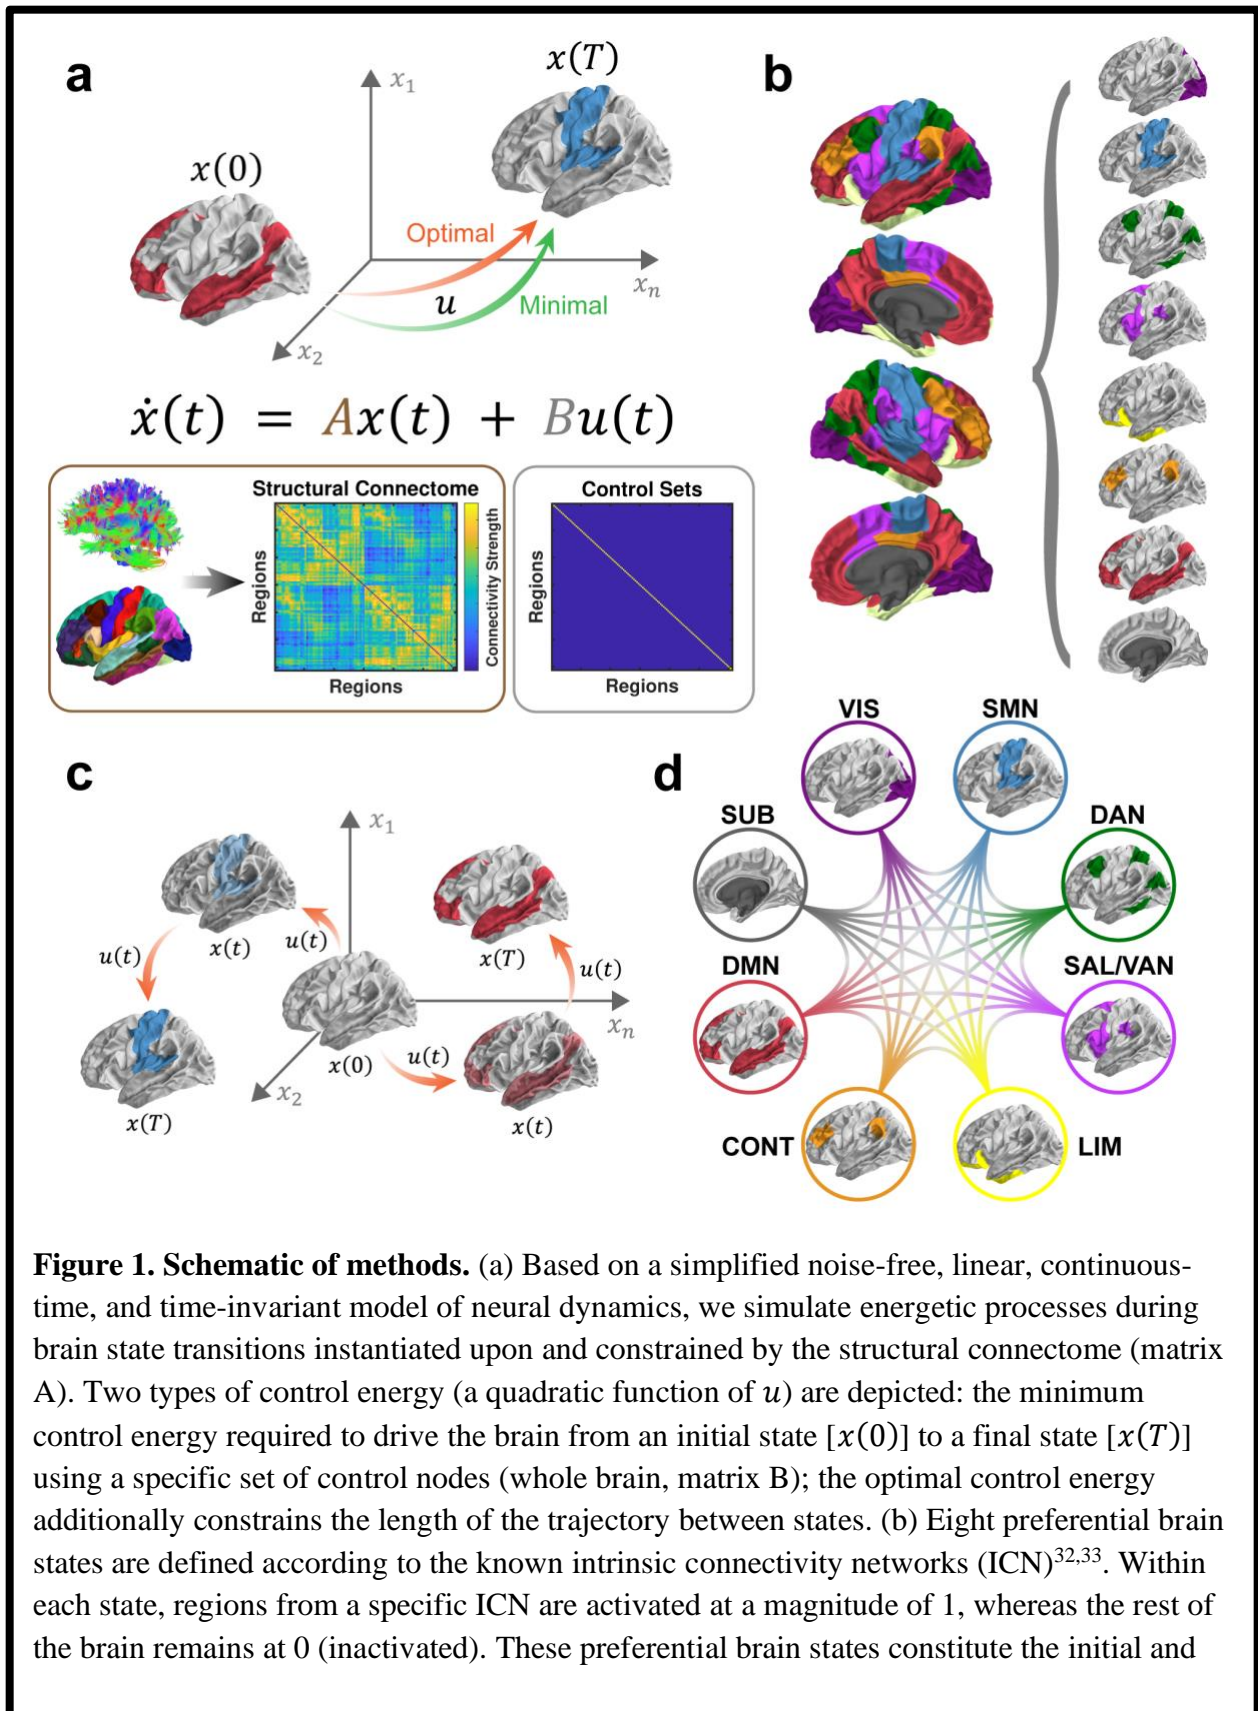

final states of our simulations. (c) We then simulate the energetic inputs required to activate each of the preferential brain states from a theoretical baseline (*i.e.*, activity magnitude of 0). Next, we estimate the optimal control energy consumed during each of the activation processes across the whole brain for each subject. (d) We also simulate transitions between preferential brain states, and estimate the minimal control energy consumed at each brain region for each subject. Abbreviations: VIS, visual network; SMN, somatomotor network; DAN, dorsal attention network; SAL/VAN, salience/ventral attention network; CONT, executive control network; DMN, default mode network; SUB, subcortical network.

125

## 126 Results

127 We started our analyses by verifying that the imaging data quality was comparable between  
 128 the two experimental groups (**Table 1**). Next, for each participant, we reconstructed a structural  
 129 white matter network as a weighted undirected adjacency matrix comprised of 122 cortical and  
 130 subcortical regions (see details in *Methods*), which formed the basis of our NCT analyses (*e.g.*,  
 131 matrix A in **Figure 1a**). We observed that TLE patients presented lower matrix density and total  
 132 weight (*i.e.*, sum of all edge weights) than HCs (**Table 1**), which is in accord with the well-  
 133 recognized white matter abnormalities in TLE<sup>38,39</sup>. To minimize the influence of demographic  
 134 and data quality metrics on our subsequent statistical analyses, we regressed them out from all  
 135 imaging derivatives using linear regression (see *Methods*).

**Table 1.** Sample demographic and clinical characteristics.

| Experimental Group (N)                            | TLE (60)    | HC (50)     | $T/\chi^2$   | <i>P</i>     |
|---------------------------------------------------|-------------|-------------|--------------|--------------|
| Age                                               | 41.13±14.41 | 37.98±11.78 | 1.24         | 0.218        |
| Sex (Male/Female)                                 | 34/26       | 26/24       | 0.24         | 0.625        |
| Handedness (Right/Left)                           | 51/9        | 42/8        | 0.02         | 0.885        |
| T1-Weighted Image Quality                         |             |             |              |              |
| <i>Image Quality Rating</i>                       | 0.858±0.006 | 0.859±0.006 | -1.13        | 0.260        |
| <i>Total Intracranial Volume (cm<sup>3</sup>)</i> | 1417±150    | 1416±143    | 0.04         | 0.969        |
| HARDI Image Quality                               |             |             |              |              |
| <i>Neighboring Correlation</i>                    | 0.795±0.013 | 0.795±0.015 | -0.31        | 0.754        |
| <i>Mean Framewise Displacement</i>                | 0.375±0.155 | 0.343±0.132 | 1.16         | 0.251        |
| Structural Network Properties                     |             |             |              |              |
| <i>Matrix Density</i>                             | 0.895±0.045 | 0.911±0.045 | -1.79        | 0.076        |
| <i>Matrix Total Weight (log<sub>10</sub>(·))</i>  | 7.078±0.018 | 7.086±0.014 | <b>-2.58</b> | <b>0.011</b> |
| Seizure Focus (LT/RT)                             | 38/22       |             |              |              |
| Age at Epilepsy Onset (year)                      | 25.28±15.59 |             |              |              |
| Duration of Epilepsy (year)                       | 15.85±16.46 |             |              |              |
| Temporal Pathology (NB/HS/Other)                  | 15/27/18    |             |              |              |

136

137

|                                              |            |
|----------------------------------------------|------------|
| Frequency of FIAS (num. per month)           | 9.28±16.41 |
| FBTCS History ( <i>none/remote/current</i> ) | 19/16/25   |
| Seizure Type                                 |            |
| <i>FIAS</i>                                  | 9          |
| <i>FAS</i>                                   | 1          |
| <i>FIAS/FAS</i>                              | 9          |
| <i>FIAS+FBTCS</i>                            | 22         |
| <i>FAS+FBTCS</i>                             | 1          |
| <i>FIAS/FAS+FBTCS</i>                        | 14         |
| <i>FBTCS</i>                                 | 4          |
| Num. of current AEDs (1/2/3)                 | 27/26/7    |

Continuous variables were presented as mean ± standard deviation. Abbreviations and definitions: TLE, patients with temporal lobe epilepsy; HC, healthy controls; HARDI, high angular resolution diffusion imaging; FIAS, focal impaired awareness seizure; FAS, focal aware seizure; FBTCS, focal to bilateral tonic-clonic seizure; AED, anti-epileptic drug. The quality of T1-weighted images was assessed with an image quality rating and the total intracranial volume produced with the Computational Anatomy Toolbox (CAT12)<sup>99</sup>. The quality of HARDI data was assessed with a neighboring correlation index<sup>79</sup> which quantified the similarity between low-b volumes with similar gradient directions, as well as with the mean framewise displacement<sup>78</sup> as a measure of head motion. Seizure focus was classified as: left temporal (LT) and right temporal (RT). Temporal pathology was diagnosed by neuroradiologists based on presurgical MRI scans as: normal brain MRI (NB); hippocampal sclerosis (HS); other pathologies (Other), such as tumor, focal cortical dysplasia, encephalocele, etc. FBTCS history was sorted as: *none*, patients who had never had any FBTCS events during their lifetime; *remote*, patients who had experienced FBTCS in the past, but none for one year or more prior to scanning; *current*, patients who had recurrent FBTCS within one year prior to scanning<sup>44,100</sup>. For continuous variables, independent *t*-tests were conducted. For categorical variables, chi-square tests were conducted. Significant differences were highlighted in bold.

138

139 ***Simulated activation of intrinsic connectivity networks***

140 Our first research question pertained to the energetic costs associated with *reaching* each  
141 preferential brain state. Specifically, we examined the extent to which TLE patients exhibited  
142 energetic abnormalities during the activation of eight canonical ICNs<sup>33,36</sup>, including the visual,  
143 somatomotor, dorsal attention, salience/ventral attention, limbic (including amygdala and  
144 hippocampus), executive control, default mode, and subcortical networks (**Figure 1b**). We used  
145 the optimal control framework<sup>26,29,36,40</sup> to model how the brain’s underlying structural network  
146 facilitated transitions from an initial baseline state to each preferential (final) state. Here, the  
147 initial state was set at a theoretical baseline with activity magnitude in all regions at 0. For each

148 of our 8 preferential states, the activity magnitude of regions within a specific ICN was set to 1,  
149 while the rest of the brain remained at  $0^{26}$ . Thus, these *reaching transitions* simulated the rise of  
150 activity in the target ICN from a mean-centered baseline, mimicking the activation process  
151 triggered by specific cognition operations. For this model, an optimal solution of the control  
152 energy needed at each region can be produced by constraining both the energy costs and the  
153 length of the transition trajectory based on the underlying network topology<sup>37</sup>. As previously<sup>37</sup>,  
154 we referred to this solution as the *optimal control energy* (OCE), and summarized it globally as a  
155 measure of the brain's energetic efficiency (**Figure 1c**, see details in *Methods*). For each  
156 participant, we estimated the global OCE during each *reaching transition*. We regressed the  
157 confounding variables out of these global OCE estimates and compared the residuals between  
158 our two groups using a permutation-based *t*-test<sup>41</sup>, an approach that simultaneously corrects for  
159 multiple comparisons by controlling the family-wise error rate<sup>42</sup>. We found that TLE patients  
160 required greater global OCE to activate the limbic network compared to HCs (Welch's  $t_{108}=3.80$ ,  
161  $P_{\text{corr}}=0.002$ ). The global OCE needed to activate other ICNs did not significantly differ between  
162 the two groups (Welch's  $|t_{108}'s|<1.55$ ,  $P_{\text{corr}}>0.609$ ) (**Figure 2**). This finding suggests that it is  
163 energetically more challenging for TLE patients to specifically activate the limbic network.

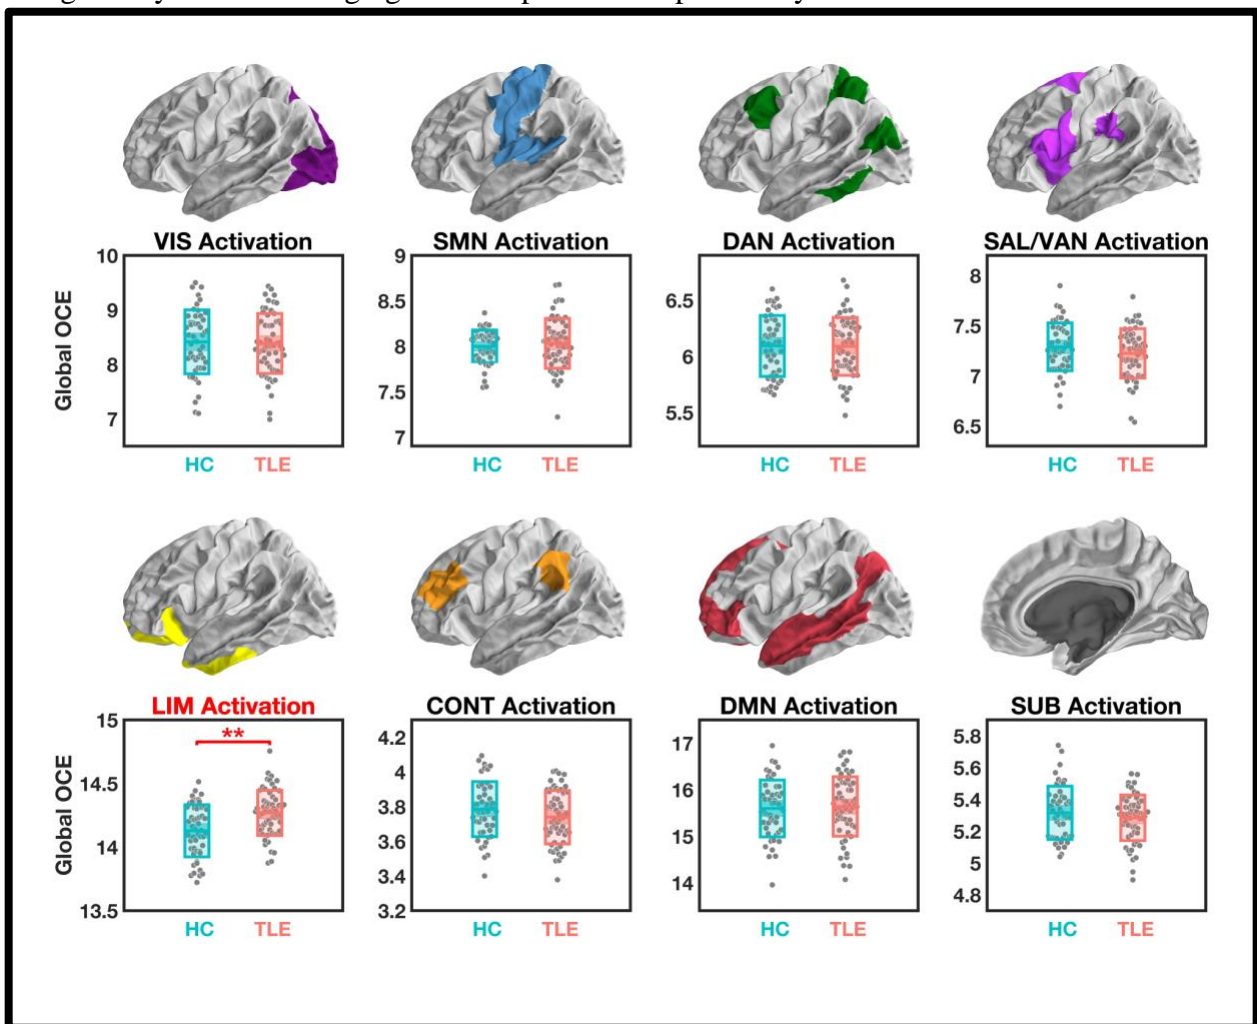

164



**Figure 2. Global optimal control energy (OCE) estimated during simulated activation of intrinsic connectivity networks.** After correction for multiple comparisons, significant group differences were only found for the simulated activation of the limbic network (LIM), which demanded more global OCE in patients with temporal lobe epilepsy (TLE) compared to healthy controls (HC). Other abbreviations: VIS, visual network; SMN, somatomotor network; DAN, dorsal attention network; SAL/VAN, salience/ventral attention network; CONT, executive control network; DMN, default mode network; SUB, subcortical network. \*\*,  $P_{\text{corr}} < 0.01$ . The central mark indicates the median, and the bottom and top edges of the box indicate the 25<sup>th</sup> and 75<sup>th</sup> percentiles, respectively.

165  
166 In the above analysis, our preferential states were defined with ICNs extended into both  
167 hemispheres. However, seizures in our enrolled TLE patients were exclusively of unilateral  
168 origin, *i.e.*, from either the left or the right temporal lobe. This laterality of seizure focus suggests  
169 that the energetic inefficiency we observed in these patients may be asymmetric, especially with  
170 regard to the limbic network, which includes both the epileptogenic temporal lobe and its  
171 contralateral counterpart. To probe this asymmetry, we re-simulated the *reaching transition* for  
172 the limbic network twice, once to activate limbic regions in the left hemisphere only, and once to  
173 activate regions in the right hemisphere. Although such a hemispheric restriction of activation is  
174 unlikely to occur in the brain, the simulation offers an opportunity to assess the laterality of the  
175 pathological burden observed in TLE patients. When examining lateralized global OCE, we  
176 found a significant hemisphere-by-group interaction [ $F_{(2,107)}=15.20$ ,  $P=2\times 10^{-6}$ ] (**Figure 3**),  
177 demonstrating that TLE patients required more energy to activate the limbic network ipsilateral  
178 to the seizure focus. More specifically, TLE patients with a left-sided seizure focus required  
179 more energy to activate the left-hemispheric limbic network (vs. right TLE:  $P_{\text{Bonferroni}}=0.048$ ; vs.  
180 HC:  $P_{\text{Bonferroni}}=4\times 10^{-5}$ ), whereas TLE patients with a right-sided seizure focus required more  
181 energy to activate the right-hemispheric limbic network (vs. left TLE ( $P_{\text{Bonferroni}}=0.007$ ); vs. HC:  
182  $P_{\text{Bonferroni}}=2\times 10^{-4}$ ). By contrast, we observed no significant differences between TLE patients and  
183 HCs in the energy needed to activate the contralateral limbic network ( $P_{\text{Bonferroni}}\text{'s}>0.588$ ). Thus,  
184 the extra energetic costs associated with limbic network activation in TLE can be attributed to  
185 the increased energetic needs of the ipsilateral hemisphere, but not of the contralateral one.

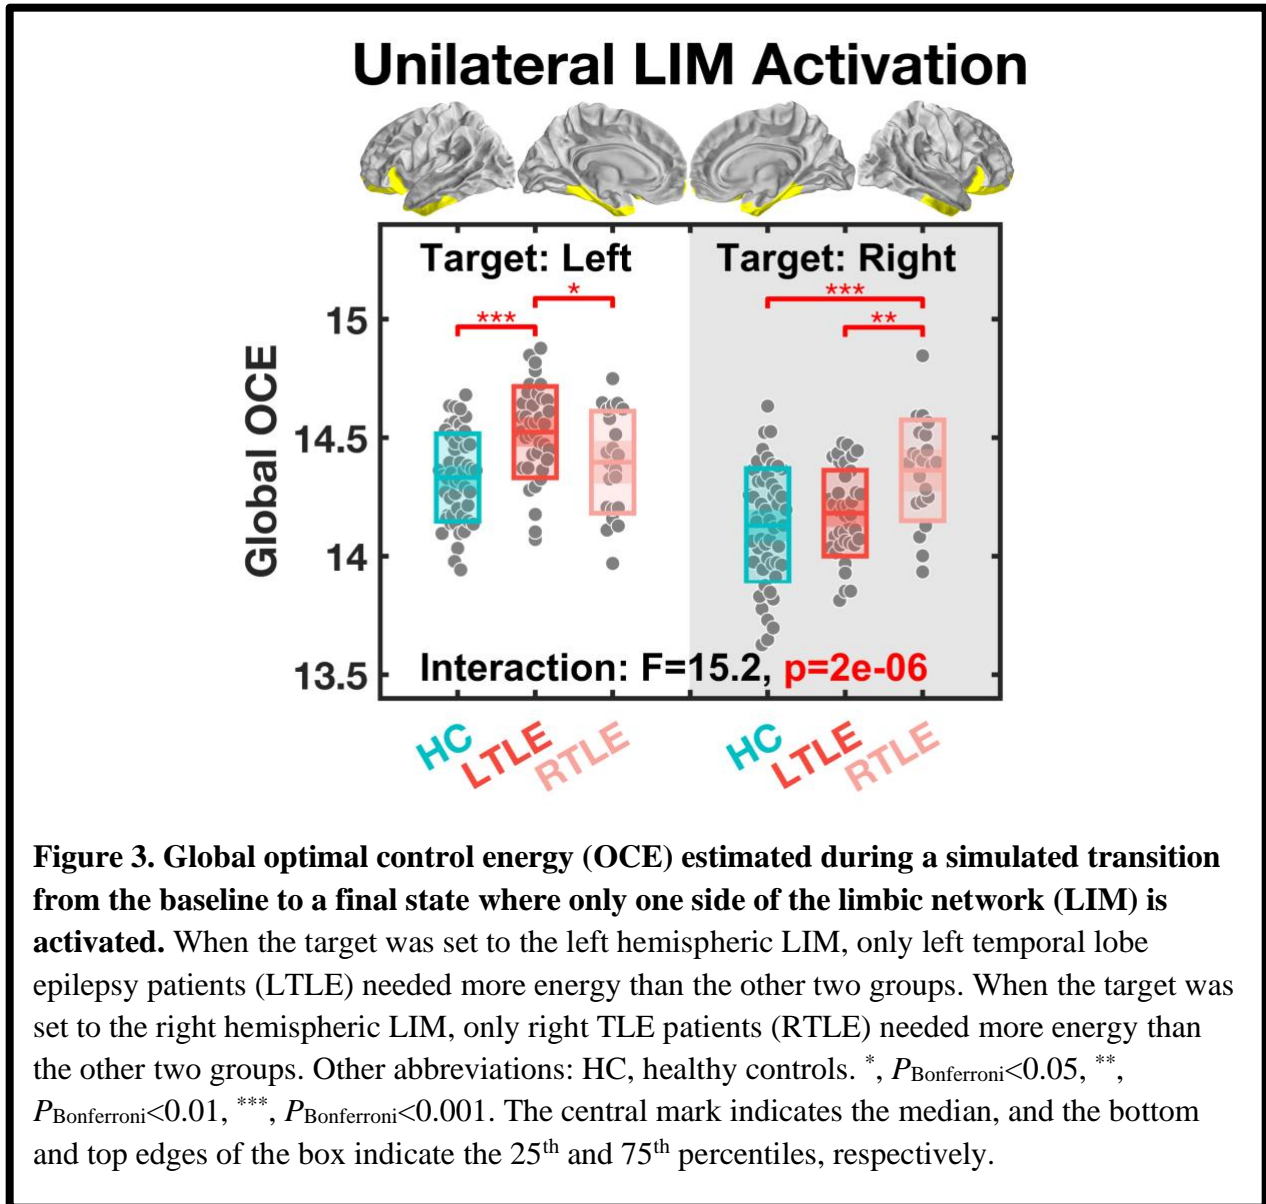

186

#### 187 **Regional energetic efficiency in supporting brain state transitions**

188 Empirical brain dynamics depend not only on the attainment of different states, but even  
189 more on the flexible transitions among them, supported by brain regions consuming energy at  
190 different efficiencies. While our *reaching transition* simulations enabled us to identify global  
191 energetic inefficiency during limbic network activation in TLE patients, such transitions are not  
192 necessarily representative enough, *i.e.*, the brain does not revisit a specific baseline each time,  
193 but rather, continuously transitions between different states. Thus, to better profile regional  
194 energetic efficiency, we extended our investigation to examine *switching transitions* among our  
195 preferential states, as a closer approximation of empirical brain dynamics<sup>36</sup>. For each subject, we  
196 modeled a total of 64 pairwise transitions, including both reciprocal state transitions and single  
197 state persistence (*i.e.*, transition starts and ends at the same state) among the eight ICN-defined  
198 preferential states (**Figure 1d**). To allow maximal flexibility during the simulated transitions, we

199 estimate the *minimal control energy* (MCE), which can be obtained by only constraining for the  
200 control input to facilitate the designated transition regardless of its trajectory<sup>37</sup>. For each region,  
201 we averaged the MCE across all 64 transitions as a region-specific metric of energetic efficiency  
202 at the individual level. To enhance statistical power<sup>38,43,44</sup>, we mirror-flipped the regional MCE  
203 of the right TLE patients to group metrics according to the laterality of the seizure focus<sup>38,44,45</sup>.  
204 This procedure was done after confound regression Z-standardization of each patient's regional  
205 MCE relative to HC data. Thus, instead of comparing raw values of regional MCE from mixed  
206 hemispheric origin between patients and HCs, we performed a permutation-based one-sample *t*-  
207 test on patients' Z-scores of the 122 regions, to identify abnormal regional energetic efficiencies  
208 within ipsilateral and contralateral hemispheres, respectively (see *Methods* for further details).

209 After applying a multiple comparison correction, we found that regional MCE was  
210 significantly elevated in TLE patients within the ipsilateral hemisphere only. This elevation  
211 occurred specifically in regions such as the temporal pole ( $t_{59}=5.40$ ,  $P_{\text{corr}}=10^{-4}$ ), inferior temporal  
212 gyrus ( $t_{59}=5.03$ ,  $P_{\text{corr}}=5\times 10^{-4}$ ), amygdala ( $t_{59}=6.01$ ,  $P_{\text{corr}}=10^{-5}$ ), hippocampus ( $t_{59}=5.24$ ,  
213  $P_{\text{corr}}=2\times 10^{-4}$ ), parahippocampal gyrus ( $t_{59}=4.54$ ,  $P_{\text{corr}}=0.003$ ), and fusiform gyrus ( $t_{59}=4.93$ ,  
214  $P_{\text{corr}}=7\times 10^{-4}$ ), as well as the isthmus of the cingulate gyrus ( $t_{59}=4.17$ ,  $P_{\text{corr}}=0.011$ , rest of the  
215 brain:  $|t_{59}'s|<3.41$ ,  $P_{\text{corr}}>0.114$ ) (**Figure 4a**). No significant effects were observed in the  
216 contralateral hemisphere. In TLE, these regions required more energy to facilitate the same brain  
217 state transitions than in HC. Furthermore, this energetic inefficiency was largely located in the  
218 ipsilateral temporo-limbic regions, consistent with our previous results showing the costly  
219 activation of the limbic network in TLE patients.

220 It remains to be determine, however, whether simulating transitions among ICN-defined  
221 brain states can provide a representative overview of all possible brain state transitions. Thus, we  
222 stringently assessed the robustness of the above findings by comparing them to MCE values  
223 derived from transitions between 100,000 pairs of random initial and final states. These random  
224 states were generated following a Gaussian distribution of activity magnitude across the 122  
225 regions with a mean of 1 and a standard deviation of 0.1<sup>26</sup>. This finite repository serves as an  
226 approximation of all possible state transitions when no *a priori* brain states are explicitly defined.  
227 We adopted the same minimal control framework as above, and obtained the Z-transformed  
228 regional energy estimates. Consistent with our primary findings, we found significantly higher  
229 MCE in the ipsilateral hemisphere only, including regions such as temporal pole ( $t_{59}=4.57$ ,  
230  $P_{\text{corr}}=0.003$ ), inferior temporal gyrus ( $t_{59}=4.45$ ,  $P_{\text{corr}}=0.004$ ), amygdala ( $t_{59}=3.96$ ,  $P_{\text{corr}}=0.022$ ),  
231 hippocampus ( $t_{59}=4.44$ ,  $P_{\text{corr}}=0.004$ ), parahippocampal gyrus ( $t_{59}=5.33$ ,  $P_{\text{corr}}=2\times 10^{-4}$ ), and  
232 fusiform gyrus ( $t_{59}=5.30$ ,  $P_{\text{corr}}=2\times 10^{-4}$ ), as well as the isthmus of the cingulate gyrus ( $t_{59}=4.83$ ,  
233  $P_{\text{corr}}=0.001$ , rest of the brain:  $|t_{59}'s|<3.30$ ,  $P_{\text{corr}}>0.156$ ) (**Figure 4b**). Thus, these randomly  
234 generated brain states yielded results matching those observed from ICN-defined brain states,  
235 supporting the notion that our preferential states appropriately represented the repertoire of  
236 empirical brain dynamics.

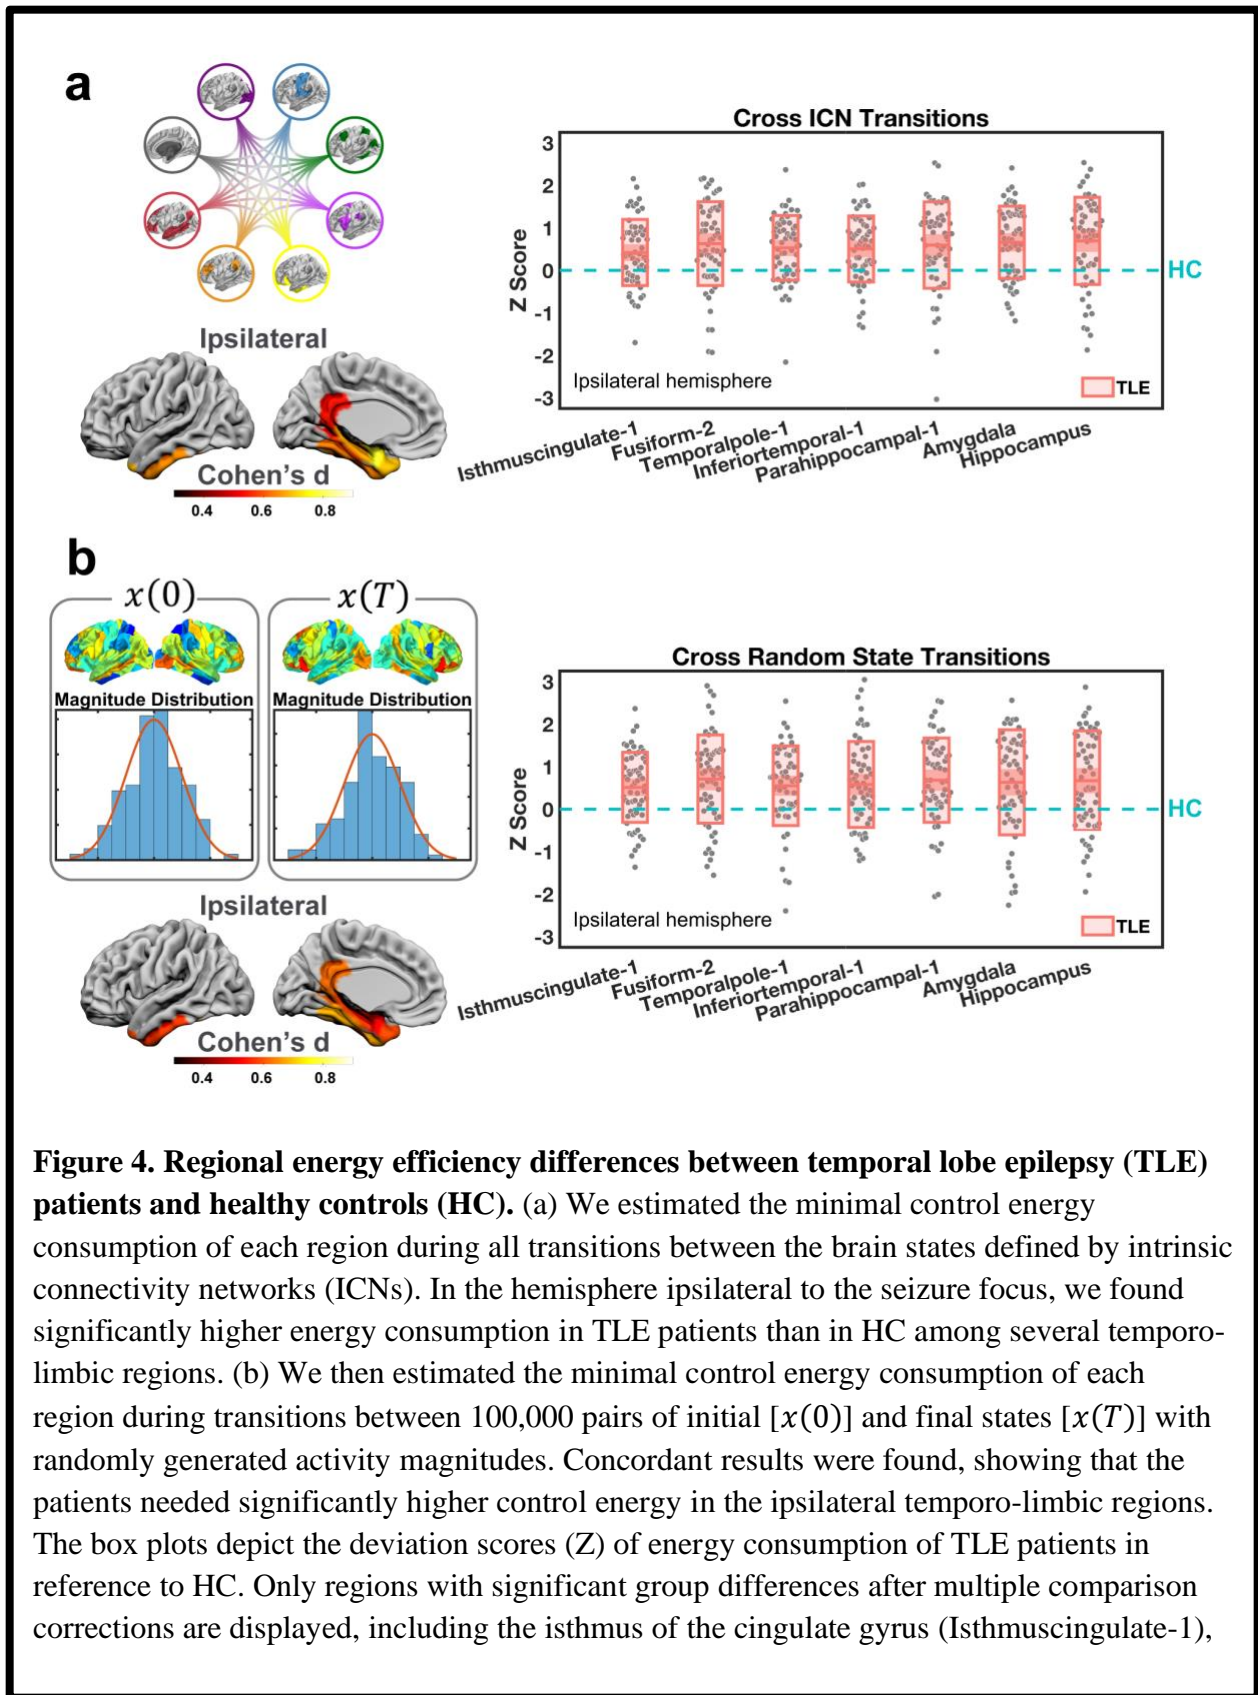

fusiform (Fusiform-2), temporal pole (Temporalpole-1), inferior temporal gyrus (Inferiortemporal-1), parahippocampal gyrus (Parahippocampal-1), amygdala, and hippocampus.

238

### 239 ***Biological validation of the brain's energetic inefficiency in TLE***

240 Through NCT, we have established that TLE is associated with energetic inefficiency during  
241 simulated brain dynamics, not only with respect to attaining preferential states, but also in  
242 transitioning among them. Next, we sought to validate our findings using an independent  
243 measurement of neurophysiological energy consumption, FDG-PET. FDG-PET is a common  
244 clinical investigation used for seizure focus localization, and allows probing brain metabolism *in*  
245 *vivo* by measuring regional glucose uptake. Here, FDG-PET was acquired in a subset of 50 TLE  
246 patients during their presurgical evaluation. In the absence of HC data as baseline, we used data  
247 from the contralateral hemisphere in the same patient as a reference. After confound regression,  
248 we generated a laterality index (LI) of glucose uptake for each region (see *Methods* for details).  
249 A negative LI indicated lower ipsilateral metabolism than contralateral, whereas a positive LI  
250 indicated higher ipsilateral metabolism than contralateral. This relative definition of hypo- vs.  
251 hypermetabolism is commonly used in clinical settings<sup>46</sup>. Leveraging this measure of metabolic  
252 integrity, we sought to identify the neurophysiological basis of the energetic inefficiency  
253 observed in our TLE patients.

254 Our first and most straightforward observation was that all the regions with disrupted  
255 energetic profiles captured by our NCT analyses — ipsilateral temporal pole, inferior temporal  
256 gyrus, amygdala, hippocampus, parahippocampal gyrus, fusiform gyrus, and isthmus of  
257 cingulate gyrus — also exhibited ipsilateral hypometabolism (permutation-based one-sample *t*-  
258 test correcting for multiple comparisons, **Supplementary Table 1, Figure 5a**). To expound on  
259 this observation, we also calculated LIs of the regional MCE in these regions, and tested  
260 bivariate correlations between the 7 pairs of LIs (i.e., one for MCE and one for glucose uptake)  
261 with a permutation-based product-moment correlation controlling for multiple comparisons. We  
262 found significant correlations between LIs at the temporal pole ( $R_{49}=-0.37$ ,  $P_{\text{corr}}=0.049$ ),  
263 amygdala ( $R_{49}=-0.62$ ,  $P_{\text{corr}}=8\times 10^{-6}$ ), hippocampus ( $R_{49}=-0.60$ ,  $P_{\text{corr}}=3\times 10^{-5}$ ), parahippocampal  
264 gyrus ( $R_{49}=-0.50$ ,  $P_{\text{corr}}=0.002$ ), and the fusiform gyrus ( $R_{49}=-0.39$ ,  $P_{\text{corr}}=0.036$ ), but not within  
265 the inferior temporal gyrus ( $R_{49}=-0.34$ ,  $P_{\text{corr}}=0.096$ ) or isthmus of cingulate gyrus ( $R_{49}=-0.22$ ,  
266  $P_{\text{corr}}=0.551$ ) (**Figure 5b-h**). These results suggest that the regions where TLE patients show  
267 greater control energy needs also show greater *hypometabolism* (i.e., lower metabolic baseline)  
268 with respect to their contralateral counterparts.

269 One common reason for a region to exhibit hypometabolism is the loss of local structural  
270 integrity as manifest by gray matter atrophy<sup>47,48</sup>. Accordingly, within the above-mentioned  
271 regions, we also examined whether the LI of control energy was correlated with the LI of gray  
272 matter volume. We found a significant correlation between energy and volume LIs in the  
273 hippocampus only ( $R_{49}=-0.47$ ,  $P_{\text{corr}}=0.005$ ; all other regions had  $|R_{49}|<0.32$  and  $P_{\text{corr}}>0.167$ ).  
274 This finding indicates that greater gray matter volume loss in the hippocampus is associated with

275 greater control energy needs. Interestingly, a bootstrapped mediation analysis focusing on the  
 276 hippocampus found that the LI of glucose uptake provided full mediation of the association  
 277 between LI of gray matter volume and LI of control energy ( $\beta=-0.125$ ,  $P=0.016$ , **Figure 5i**).  
 278 Thus, the loss of local structural integrity may serve as a substrate leading to a decline in baseline  
 279 regional metabolism, which in turn engenders inefficient control of brain dynamics.

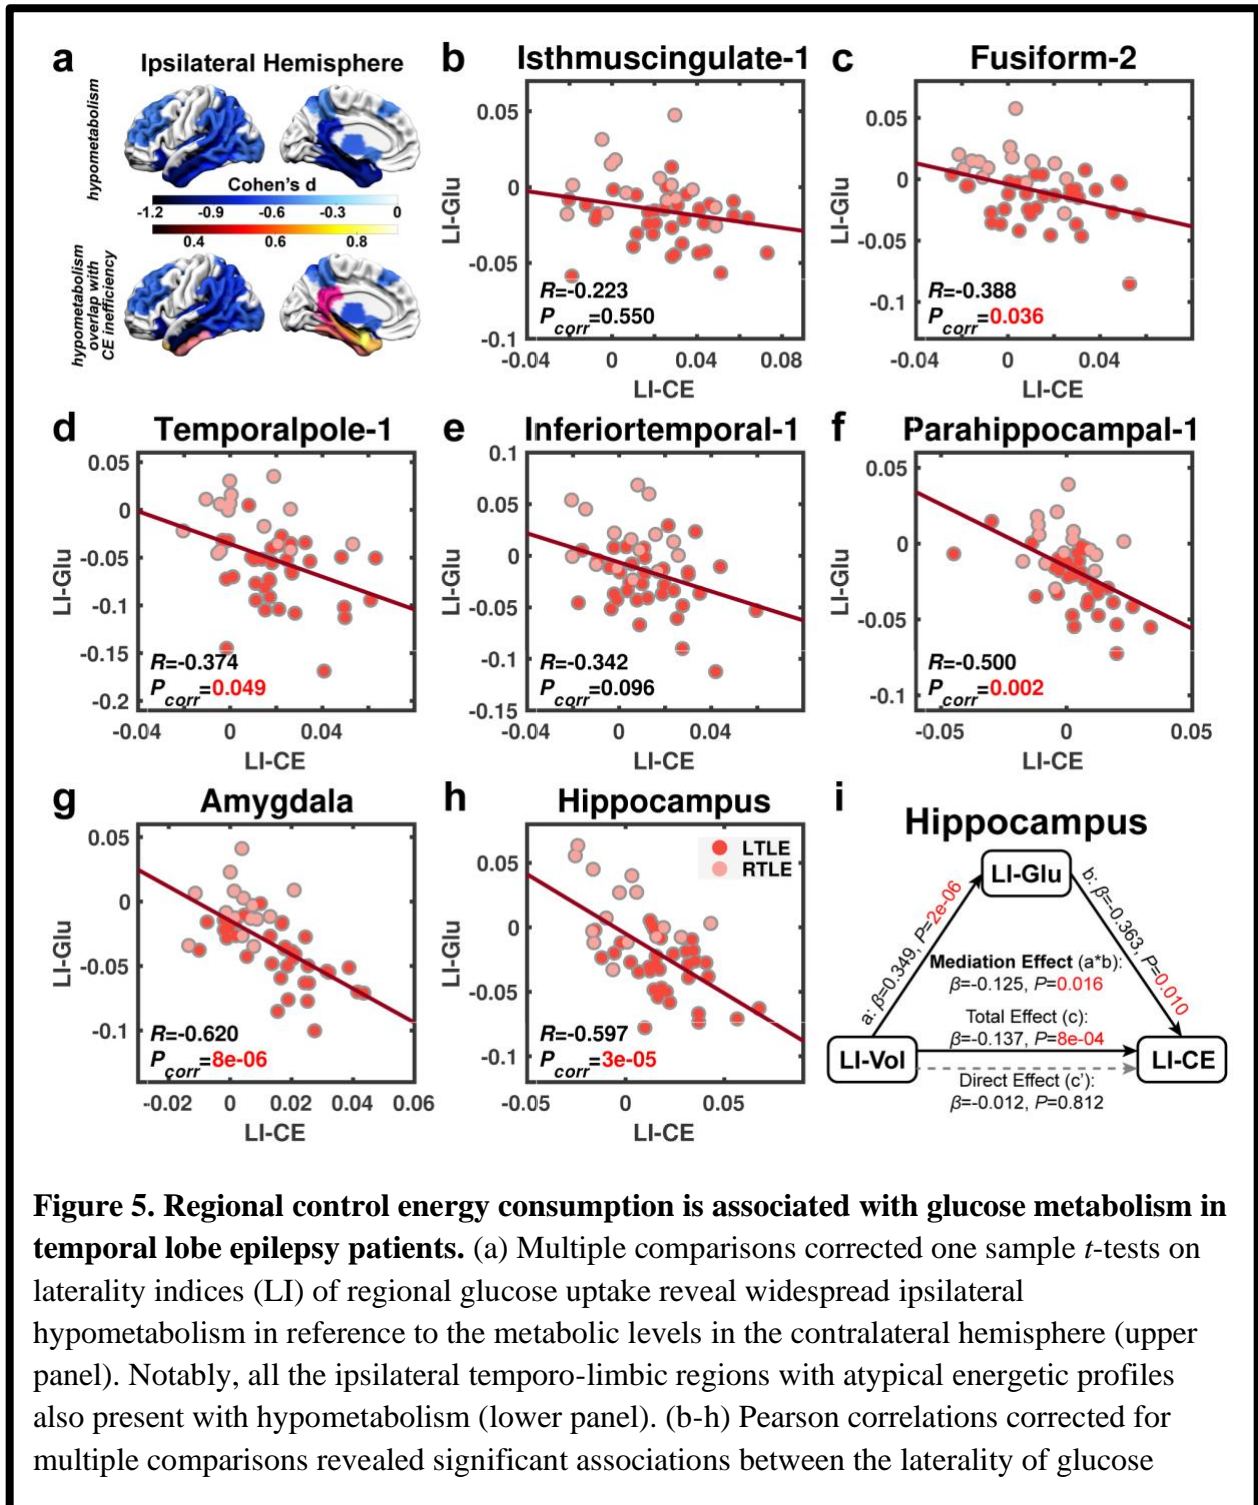

**Figure 5. Regional control energy consumption is associated with glucose metabolism in temporal lobe epilepsy patients.** (a) Multiple comparisons corrected one sample *t*-tests on laterality indices (LI) of regional glucose uptake reveal widespread ipsilateral hypometabolism in reference to the metabolic levels in the contralateral hemisphere (upper panel). Notably, all the ipsilateral temporo-limbic regions with atypical energetic profiles also present with hypometabolism (lower panel). (b-h) Pearson correlations corrected for multiple comparisons revealed significant associations between the laterality of glucose

uptake and minimal control energy consumption during all the transitions between the states defined by intrinsic connectivity networks (ICN), most prominently in the limbic regions, whereas the side with lower glucose metabolic baseline consumes more control energy. Corrected  $P$ -values ( $P_{\text{corr}}$ ) are depicted. (i) A mediation analysis is performed on the hippocampus, where the association between the laterality of gray matter volume (LI-Vol) and control energy (LI-CE) is also found to be significant. We found that the laterality of glucose uptake (LI-Glu) provides a full mediation of the association between the former two variables. The significance of the mediation effect was assessed using bootstrapped confidence intervals.

281

## 282 Discussion

283 Pathological disruptions to normal brain dynamics in patients with drug-resistant epilepsy are  
284 associated with both transient and enduring detrimental effects on brain function<sup>10,49</sup>, which can  
285 significantly compromise quality of life. Developing treatments to alleviate such impairments is  
286 challenging owing to our limited understanding of how pathological conditions such as TLE alter  
287 energetic processes needed to facilitate desired brain dynamics. To this end, the recent  
288 development of network control theory has provided new opportunities to profile the energy  
289 landscape of the brain during simulated neural dynamics in which activity spreads along the  
290 structural connectome. Leveraging this framework, we showed that TLE patients required more  
291 control energy to activate the limbic network compared to HCs. In particular, this increased  
292 energy was localized to the limbic network ipsilateral to patients' seizure focus. Further, we  
293 quantified regional energy profiles during transitions between different brain states, and found  
294 that the mesial and inferior parts of the ipsilateral temporal lobe in TLE consumed more control  
295 energy on average. Intuitively, the extra energetic demands in these patients may result in  
296 suboptimal dynamics and inadequate activation, and eventually impair function. Additionally, by  
297 conceptualizing TLE as a lateralized lesion model, we demonstrated that the imbalance of  
298 energetic costs between the ipsilateral and contralateral mesial and inferior temporal regions was  
299 also mirrored in their asymmetric metabolic patterns, whereby regions with lower baseline  
300 metabolic levels also had higher energetic demands. Specifically, for the hippocampus, we found  
301 significant associations between lateralization of energy costs, glucose uptake and gray matter  
302 volume, with hypometabolism fully mediating the increase in energy demand pertaining to  
303 volume loss on the ipsilateral side.

304 In this study, we focused on two main categories of brain state transitions. The first probed  
305 the efficiency with which patients' brains could attain each of 8 ICN-defined preferential brain  
306 states from a common baseline. Compared to HCs, TLE patients needed greater global control  
307 energy to activate the limbic network, especially its ipsilateral side. Thus, it is plausible that  
308 failing to meet these increased energy demands may underpin inadequate limbic activation and  
309 dysfunction. Considering the overlap between the limbic network and the seizure focus in TLE,  
310 dysfunction within this network is expected in these patients. For instance, episodic memory

311 deficits and affective comorbidities are commonly reported in TLE<sup>11,13</sup>, and can be reasonably  
312 attributed to limbic dysfunction. Previous imaging studies have shown that some limbic regions,  
313 such as the epileptogenic hippocampus, are less activated during episodic memory encoding in  
314 TLE<sup>50-52</sup>. Finally, altered functional connectivity seeded from the amygdala is also associated  
315 with comorbid psychiatric symptoms in these patients<sup>53</sup>. In line with this evidence, our findings  
316 suggest that TLE is associated with compromised energetic efficiency of ipsilateral limbic  
317 regions.

318 Brain function depends on the ability to reach desired brain states and to swiftly transition  
319 among them. Therefore, our second set of analyses focused on modeling the brain's capacity to  
320 transition between pairs of ICN-defined preferential states. Across all possible pairwise  
321 transitions, we found that TLE patients exhibited elevated control energy requirements compared  
322 to HCs, again rooted in ipsilateral temporo-limbic regions. These results suggest that disruption  
323 to the underlying structural networks of TLE patients not only affects the activation of the limbic  
324 network, but also leads to greater energy demands of ipsilateral temporo-limbic regions during  
325 transitions among all ICN-defined states. Finally, we sought to further validate our findings by  
326 testing 100,000 pairs of random brain states that were not *a priori* rooted in functional  
327 neuroanatomy. In doing so, we found near-identical results, demonstrating that the increased  
328 energy costs in the ipsilateral temporo-limbic regions represent a general signature of  
329 dysfunctional control of neuronal dynamics in TLE patients. Collectively, our study provides  
330 evidence that altered brain dynamics in TLE, as a pathological trait, are underpinned by energetic  
331 inefficiency that mostly affects areas in proximity or closely connected to the seizure focus, and  
332 may represent a substrate of enduring brain dysfunction.

333 What is the neurophysiological basis of this trait? While NCT has been applied to  
334 neuroscience in recent years, the biological nature of control energy has remained unclear. We  
335 know that the brain consumes energy via glucose metabolism<sup>6</sup>, and previous studies have linked  
336 control energy to cognitive effort<sup>25</sup>. Therefore, we hypothesized that the magnitude of control  
337 energy may reflect the extent of local metabolism needed to instantiate the desired neural  
338 dynamics. Indeed, using FDG-PET, we showed that regional energetic inefficiency coexists with  
339 altered metabolism in TLE. Considering unilateral TLE as a lesion model, we observed that  
340 reduced baseline glucose intake (*i.e.*, hypometabolism) aligned, as clinically expected, with the  
341 side of seizure focus. Taking the contralateral hemisphere as reference, we found that greater  
342 ipsilateral hypometabolism was associated with greater ipsilateral energetic inefficiency. For the  
343 first time, we thus highlight a formal link between theoretical control energy and a physiological  
344 measure of brain metabolism, and suggest that the compromised metabolic baseline in affected  
345 regions may lead to greater energetic challenges in supporting desired brain dynamics.

346 A common cause of metabolic alterations may be the loss of underlying structural integrity.  
347 For instance, concomitant gray matter volume loss and hypometabolism is reported in patients  
348 with TLE, especially in epileptogenic regions such as the hippocampus<sup>54</sup>. In our TLE patients,  
349 we found that gray matter volume asymmetry was also associated with energy asymmetry in the  
350 hippocampus. Through a mediation analysis, we formally demonstrated that the asymmetry of



351 baseline metabolism fully mediates the association between the asymmetry of gray matter  
352 volume and energy costs. That is, greater volume loss may lead to greater baseline  
353 hypometabolism, thereby increasing energy demands during brain state transitions in the  
354 ipsilateral hippocampus. Such results deliver a unifying framework, linking independently  
355 measured regional volumetrics, glucose metabolism, and network control properties derived  
356 from structural networks. Our work thus captures both the metabolic and volumetric bases of  
357 control energy, further supporting its application in modeling the endogenous resources  
358 consumed during brain dynamics in the absence of external stimulation. In addition, our work  
359 suggests that the magnitude of control energy is not only modulated by the transition  
360 trajectory<sup>25,29,37</sup>, but also by the integrity of the underlying structure. Specifically, regions  
361 harboring pathology, such as the hippocampus in TLE, can exhibit different degrees of neural  
362 loss, causing a metabolic resource gap that in turn impacts brain state transitions.

363 Several methodological considerations are pertinent to this study. First, the structural  
364 connectome obtained via diffusion tractography used in our study is an approximation of the real  
365 structural scaffold of functional brain dynamics. Implementing other forms of structural  
366 connectivity, such as a spatial adjacency network, may provide added value to our model<sup>37</sup>.  
367 Second, we modeled the neural dynamics under assumptions of linearity and time-invariance,  
368 following previous studies<sup>26,29,36,37,40</sup>. Recent research has shown that such simplified models can  
369 provide useful first-order approximations of brain dynamics<sup>55,56</sup>, and even outperform non-linear  
370 models when predicting the macroscopic brain activity measured by functional magnetic  
371 resonance imaging and intracranial electrocorticography<sup>57</sup>. Nonetheless, further adaptations are  
372 expected to incorporate advanced features such as non-linearity<sup>58,59</sup> and time-dependence<sup>60</sup>.  
373 Third, as in previous studies<sup>26,36,40</sup>, we defined a discrete set of brain states based on ICNs known  
374 to underpin cognition<sup>32,34,35</sup>. Alternatively, the magnitude of brain states could also be defined  
375 via empirically measured neurophysiological signals<sup>25,27,29</sup>. However, the estimated energy costs  
376 in our model not only depend on the network structure, but also on the distance between the  
377 initial and final states<sup>29</sup>. Thus, by setting binary states uniformly, we ensured a consistent  
378 transition distance across all subjects. Accordingly, the extent of energy costs only reflects the  
379 efficiency of the underlying network structure (or the lack thereof) during the same designated  
380 dynamic process. Fourth, our TLE cohort was heterogeneous in etiology, which may raise the  
381 possibility of subgroup-specific energetic characteristics that were not addressed in the current  
382 study. Last, some antiepileptic drugs (AED) may affect brain dynamics<sup>61</sup>; however, due to the  
383 heterogeneous regimen of AED history in our patients, we did not focus on the relationship  
384 between AED and control energy profiles here. Similarly, while interictal epileptic discharges  
385 (IEDs) can transiently influence brain dynamics, their relevance to control energy warrants  
386 further investigation, as quantitative measures of IEDs were not available in this study.

## 387 **Outlook**

388 Focusing on temporal lobe epilepsy as a disease model, our study provides a framework  
389 linking loss of structural integrity, alteration of local metabolism, and greater energetic  
390 challenges to attain desired brain state transitions, leading to altered brain dynamics. By

391 providing a neurophysiological basis of control energy, our work paves the way for further  
392 applications of network control theory in the field of neuroscience.

## 393 **Methods**

### 394 *Participants*

395 Sixty patients with refractory unilateral TLE (38 left-sided, 22 right-sided) were recruited  
396 from the Thomas Jefferson Comprehensive Epilepsy Center. Diagnosis was determined by a  
397 multimodal evaluation including neurological history and examination, interictal and ictal scalp  
398 video-EEG, MRI, FDG-PET, and neuropsychological testing. Localization was determined after  
399 confirming that the testing was concordant for unilateral temporal lobe epilepsy, as described  
400 previously<sup>62</sup>. Patients were excluded from the study for any of the following reasons: previous  
401 brain surgery, evidence for extra-temporal or multifocal epilepsy by history or testing,  
402 contraindications to MRI, or hospitalization for any Axis I disorder listed in the DSM-5  
403 (Diagnostic and Statistical Manual of Mental Disorders, V). Depressive disorders were  
404 admissible, given the high comorbidity of depression and epilepsy<sup>63</sup>. The demographic and  
405 clinical characteristics of the patient groups are presented in **Table 1**, along with the  
406 demographic information of 50 age-, sex-, handedness-, and education-matched healthy controls  
407 (HCs). All HC were free of psychiatric or neurological disorders based on a health screening  
408 measure. This study was approved by the Institutional Review Board for Research with Human  
409 Subjects at Thomas Jefferson University. All participants provided informed consent in writing.

### 410 *Imaging Acquisition*

411 All participants were scanned on a 3-T X-series Philips Achieva clinical MRI scanner  
412 (Amsterdam, the Netherlands) at Thomas Jefferson University Hospital. The data acquisition  
413 session included both a High Angular Resolution Diffusion Imaging (HARDI) scan as well as a  
414 high-resolution T1-weighted (T1w) anatomical scan. The HARDI scan was 61-directional with a  
415 b-value of 3000 s/mm<sup>2</sup> and TE/TR = 7517/98 ms, in addition to 1 b0 images. Matrix size was  
416 96 × 96 with a slice number of 52. Field of view was 230 × 230 mm and slice thickness was  
417 2.5 mm. Participants lay in a foam pad to comfortably stabilize the head, and were instructed to  
418 remain still throughout the scan. Prior to collection of the HARDI scan, T1w images (180 slices)  
419 were collected using an MPRage sequence (256 × 256 isotropic 1mm voxels; TR = 640 ms, TE =  
420 3.2 ms, flip angle = 8°, FOV = 256 × 256 mm) in identical positions to provide an anatomical  
421 reference. The in-plane resolution for each T1 slice was 1 mm<sup>3</sup> (axial oblique).

422 As part of their presurgical evaluation, 50 patients also underwent on-site PET scans. The  
423 other 10 patients who received PET scans from other facilities (off-site), and HC who did not  
424 receive PET scans, were excluded from the FDG-PET related analysis. All PET scans were  
425 performed during interictal periods using a standard protocol. Pre-injection blood glucose level  
426 was below 150 mg/dl for all patients (range: 61–128 mg/dl). An intravenous catheter was  
427 inserted under local anesthesia and a dose around  $5.9 \pm 1.4$  mCi of radioactive 100mg/l  
428 fluorodeoxyglucose (FDG) was injected. The scan was initiated about  $42 \pm 15$  min after the  
429 injection. Participants' eyes were open, and their ears were non-occluded. Ambient noise and

430 light was kept to a minimum. Thirty-one patients (62% of patients; 20 LTLE, 11 RTLE) were  
431 scanned on a Siemens Biograph 1080 PET/CT, with data consisting of 109 axial slices, 3 mm  
432 thick, and  $1 \times 1$  mm in resolution. The remaining 19 patients (38% of patients; 15 LTLE, 4  
433 RTLE) were scanned on a Siemens Biograph 20 mCT PET/CT, with data consisting of 110 axial  
434 slices, 3 mm thick, and  $1.6 \times 1.6$  mm in resolution. Attenuation-corrected PET images were  
435 iteratively reconstructed by standard vendor-provided software. There was no significant  
436 difference in proportion of left and right TLE patients acquired with either scanner ( $\chi^2 = 1.17$ ,  $p$   
437  $= 0.28$ ). Furthermore, we obtained asymmetry indices that use the same subject as reference,  
438 therefore reducing potential scanner-specific bias, as reported previously<sup>64</sup>. This procedure also  
439 avoids confounds related to demographic factors, such as age, medication history, and epilepsy  
440 history<sup>65,66</sup>. Nevertheless, the scanner model was also used as a categorical nuisance regressor  
441 during the data analysis along with demographic information.

#### 442 ***Imaging Processing***

443 The T1w and HARDI data were analyzed through QSIprep<sup>67</sup> (v0.8.0,  
444 <https://qsiprep.readthedocs.io>), which is based on Nipype 1.4.2. QSIprep automates diffusion  
445 MRI data preprocessing and reconstruction using well-recognized neuroimaging tools including  
446 Advanced Normalization Tools (ANTs), Analysis of Functional NeuroImages (AFNI), FMRIB  
447 Software Library (FSL), DSI Studio<sup>68</sup>, MRtrix 3<sup>69</sup>, and fMRIprep<sup>70</sup>.

#### 448 *Anatomical data preprocessing*

449 The T1w image was corrected for intensity non-uniformity using N4BiasFieldCorrection  
450 (ANTs 2.3.1<sup>71</sup>), and was used as a T1w-reference throughout the workflow. The T1w-reference  
451 was then skull-stripped using antsBrainExtraction.sh (ANTs 2.3.1), using OASIS as the target  
452 template. Spatial normalization to the ICBM 152 Nonlinear Asymmetrical template version  
453 2009c was performed through nonlinear registration with antsRegistration (ANTs 2.3.1<sup>72</sup>), using  
454 brain-extracted versions of both T1w volume and template. Brain tissue segmentation of  
455 cerebrospinal fluid (CSF), white-matter (WM) and gray-matter (GM) was performed on the  
456 brain-extracted T1w using FAST (FSL 6.0.3<sup>73</sup>).

#### 457 *Diffusion data preprocessing*

458 The HARDI image was first denoised using a Marchenko-Pastur principal component  
459 analysis (MP-PCA) method<sup>74</sup>, then underwent Gibbs-ringing artifacts removal<sup>75</sup>, and then was  
460 spatially bias corrected through MRtrix 3. Subsequently, it was corrected for head motion and  
461 eddy current distortions via eddy\_openmp (FSL 6.0.3). A deformation field to correct for  
462 susceptibility distortions was estimated based on fMRIprep's fieldmap-less approach. The  
463 deformation field was that resulting from co-registering the b0 reference to the same-subject  
464 T1w-reference with its intensity inverted<sup>76</sup>. Registration was performed with antsRegistration  
465 (ANTs 2.3.1), and the process was regularized by constraining the deformation to be nonzero  
466 only along the phase-encoding direction, and was further modulated with an average fieldmap  
467 template<sup>77</sup>. Based on the estimated susceptibility distortion, an unwarped b=0 reference was  
468 calculated for a more accurate co-registration with the T1w-reference, and then a final  
469 preprocessed HARDI image was produced in the native space of the T1w-reference with an

470 isotropic voxel size of 2 mm<sup>3</sup>. Two quality metrics were calculated based on the preprocessed  
471 data, including framewise displacement<sup>78</sup> and neighboring correlation<sup>79</sup>.

#### 472 *Diffusion data reconstruction and tractography*

473 The preprocessed HARDI image was reconstructed via MRtrix 3. Multi-tissue fiber response  
474 functions were estimated using the Dhollander algorithm, during which Fibre Orientation  
475 Distributions (FODs) were estimated via constrained spherical deconvolution [CSD<sup>80,81</sup>] using an  
476 unsupervised multi-tissue method<sup>82,83</sup>. Specifically, a single-shell-optimized multi-tissue CSD  
477 was performed using MRtrix3Tissue (<https://3Tissue.github.io>), a fork of MRtrix3. FODs were  
478 intensity-normalized using mtnormalize<sup>84</sup>. Subsequently, an anatomically-constrained  
479 probabilistic tractography<sup>85</sup> was performed using the iFOD2 probabilistic tracking method, in  
480 which the WM FODs were used for tractography and the T1w segmentation was used for  
481 anatomical constraints. For each subject we generated 10<sup>7</sup> streamlines with a maximum length of  
482 250 mm, minimum length of 30 mm, and FOD power of 0.33. Weights for each streamline were  
483 calculated using a spherical-deconvolution informed filtering of tractograms (SIFT2)<sup>86</sup>, which  
484 was then used to estimate the structural connectivity matrix.

#### 485 *Brain parcellation customization*

486 Consistent with previous work<sup>36</sup>, we chose the Lausanne parcellation scheme including n =  
487 129 cortical and subcortical parcels<sup>87</sup> to build the structural network. This parcellation scheme is  
488 established by sub-dividing the Desikan-Killiany anatomical atlas<sup>88</sup>. Specifically, to enable the  
489 proposed asymmetry analysis, we needed the parcellation to be symmetric. However, we noted  
490 that 6 regions have been subdivided asymmetrically, whereas the medial orbito-frontal gyrus,  
491 inferior parietal gyrus, and lateral occipital gyrus have one more subdivision in the right  
492 hemisphere, and the rostral middle frontal gyrus, precentral gyrus, postcentral gyrus have one  
493 more subdivision in the left hemisphere. These additional subdivisions were subsequently  
494 merged with their corresponding neighbor to match their cross-hemisphere counterpart,  
495 producing a symmetric version of the parcellation constituted by 61 pairs of cortical and  
496 subcortical parcels (excluding brainstem; details in [Supplementary Table 2](#)). This parcellation  
497 was then inversely warped onto the native space of the T1w-reference and resampled at 2 mm<sup>3</sup>  
498 voxel resolution. Using tck2connectome (MRTrix3) allowing a 2 mm radial search from each  
499 streamline endpoint to locate the nearest node, we built a 122 × 122 undirected adjacency matrix  
500 for each subject with the SIFT2 weighted streamline counts representing interregional structural  
501 connectivity.

502 To define neurobiologically meaningful brain states, we capitalized on an established  
503 functional brain parcellation<sup>89</sup> of intrinsic connectivity networks (ICNs), which was defined by  
504 clustering the resting-state functional connectivity data from 1000 healthy subjects<sup>33</sup>. This  
505 parcellation is constituted by 7 cortical ICNs that are commonly seen during both resting and  
506 task conditions<sup>32,34</sup>, including visual (VIS), somatomotor (SM), dorsal attention (DAN),  
507 salience/ventral attention (SAL/VAN), limbic (LIM), executive control (CONT), and default  
508 mode networks (DMN). As in prior work<sup>36</sup>, we mapped both parcellations to a common surface  
509 space (fsaverage), and calculated the proportional overlap of vertices between each parcel and

510 each of the 7 ICNs. Using a winner-take-all strategy, we assigned each parcel to the ICN with  
511 highest overlap proportion (**Figure 1b**). In addition, subcortical regions were summarized in an  
512 eighth, subcortical network (SC), excepting for the hippocampus and amygdala, which were  
513 assigned to the limbic network following the common clinical definition<sup>14</sup>. These 8 non-  
514 overlapping networks were used as representative brain states during simulations of brain state  
515 transitions.

#### 516 *FDG-PET data preprocessing*

517 PET images were preprocessed with Statistical Parametric Mapping 12 (SPM 12,  
518 <http://www.fil.ion.ucl.ac.uk/spm/software/spm12>), as in previous work<sup>90</sup>. Briefly, the PET image  
519 was first co-registered to the T1w-reference image, smoothed with a 6-mm kernel, and intensity-  
520 normalized by the global mean uptake estimated based on a skull-stripped brain mask derived  
521 from the T1w-reference image. Regional mean glucose uptake was subsequently estimated based  
522 on the same parcellation. As stated, in the absence of PET data from HC, we calculated the  
523 laterality index (LI,  $LI_i = \frac{L_i - R_i}{L_i + R_i}$ ) of regional glucose uptake from the aforementioned 61 pairs of  
524 parcels for the subsequent analyses.

#### 525 *Regional gray matter volume estimation*

526 Lastly, we obtained regional mean gray matter volumes (GMV) using the Computational  
527 Anatomy Toolbox (CAT12, v12.7, <http://www.neuro.uni-jena.de/cat/>). The T1w image was first  
528 denoised with a spatial adaptive non-local means (SANLM) denoising filter<sup>91</sup>, followed by  
529 internal resampling to properly accommodate low-resolution images and anisotropic spatial  
530 resolutions. Subsequently, the data was bias-corrected and affine-registered followed by the  
531 standard SPM “unified segmentation”<sup>92</sup>. The brain was then parcellated into left and right  
532 hemispheres, subcortical areas, and the cerebellum. Furthermore, local white matter  
533 hyperintensities were detected to be later accounted for during the spatial normalization.  
534 Subsequently, a local intensity transformation of all tissue classes was performed, and a final  
535 adaptive maximum *a posteriori* (AMAP) segmentation<sup>93</sup> was then refined by applying a partial  
536 volume estimation<sup>94</sup>, which effectively estimated the fractional content for each tissue type per  
537 voxel. Last, the tissue segments were spatially normalized to a common reference space using  
538 Geodesic Shooting<sup>95</sup> registration, so that the regional GMV could be estimated based on the  
539 same parcellation. In addition, the total intracranial volume and a summary image quality rating  
540 for each T1w image were exported, and were used as covariates.

### 541 ***Brain State Transitions Simulated through Linear Network Control Theory***

#### 542 *Theoretical framework of Linear Network Control Theory*

543 To investigate whether TLE is associated with compromised efficiency of common brain  
544 dynamics, we leveraged recent developments of linear network control theory, and explored the  
545 energetic efficiency of the structural brain network in facilitating designated brain state  
546 transitions. As in previous work<sup>26,29,36,37,40</sup>, we employed a simplified noise-free linear and time-  
547 invariant network model to describe the dynamics of the brain:

$$548 \quad \dot{x} = Ax(t) + Bu(t).$$

549 (1)

550 Here,  $x(t)$  is a  $N \times 1$  vector that represents the state (*i.e.*, activity level) of each node of the  
 551 system at time  $t$  ( $N = 122$ ).  $A$  is a  $N \times N$  adjacency matrix denoting the relationship between the  
 552 system elements, which can be operationalized as the structural brain network. To ensure the  
 553 stability of the system,  $A$  is normalized as follows<sup>37</sup>:

$$555 \quad A_{norm} = \frac{A}{\|\lambda(A)_{max}\| + 1} - I, \quad (2)$$

556 whereas  $\lambda(A)_{max}$  denotes the largest positive eigenvalue of the system and  $I$  denotes the  $N \times N$   
 557 identity matrix.  $B$  is the input matrix that identifies the nodes in the control set. Here we set  $B$  to  
 558 be the  $N \times N$  identity matrix to set all the brain parcels as control nodes where energy can be  
 559 consumed to facilitate brain state transitions. Last,  $u(t)$  denotes the amount of energy injected  
 560 into each control node at each time point  $t$ . Intuitively,  $u(t)$  can be summarized over time to  
 561 represent the total energy consumption during transition from an initial state to a final state.

562 *Simulation I: Individual ICN activation*

563 In our first simulation, we considered the scenario that the brain transits from an initial  
 564 baseline state ( $x_0 = x(t = 0)$ ) to a final state ( $x_T = x(t = T)$ ) when a specific ICN is  
 565 predominantly activated. We modeled this control task by setting:

$$566 \quad x_i(t = 0) = 0, i = 1, \dots, 122,$$

567 and

$$568 \quad x_i(t = T) = \begin{cases} 0, & \text{if } i \notin ICN_k, k = 1, \dots, 8. \\ 1, & \text{if } i \in ICN_k, \end{cases}$$

569 Note that, theoretically, setting the initial state to full zeros does not necessarily mean that the  
 570 brain is globally inactive, which is biologically impossible. Rather, it can be viewed as a mean-  
 571 centered baseline, and the final state has additional activations within the specific ICN than other  
 572 regions by 1 arbitrary unit. This setting is analogous to task fMRI analyses, where contrasts are  
 573 commonly set between a condition of interest (1) and a baseline (0)<sup>26</sup>.

574 To explore the energetic efficiency of the structural brain network in facilitating the  
 575 activation of specific ICNs, we adopted the optimal control framework to estimate the control  
 576 energy required to optimally steer the brain through these state transitions<sup>26,29</sup>. Against a  
 577 naturalistic trajectory, when the brain state drifts without any control input, the proposed state  
 578 transition commonly relies on the additional control input  $u(t)$  to reach the desired final state.  
 579 This control effort can be intuitively understood as an internal cognitive control process (or as  
 580 external brain stimulation in other patient scenarios), and it is based on both the energy costs and  
 581 the length of the transition trajectory<sup>37</sup>. Therefore, an optimal solution can be described as the  
 582 minimized combination of both the length of the transition trajectory and the required control  
 583 energy, during the state transition from an initial state ( $x(0) = x_0$ ) to the final state ( $x(T) =$   
 584  $x_T$ ) over the time horizon  $T$  (see Refs. <sup>40,96</sup>):

$$585 \quad u(t)^* = \underset{u}{\operatorname{argmin}} J(u) = \underset{u}{\operatorname{argmin}} \int_0^T \left( (x_T - x(t))^T S (x_T - x(t)) + \rho u(t)^T u(t) \right) dt,$$

586 (3)

587 where  $(x_T - x(t))^T(x_T - x(t))$  is the distance between the state at time  $t$  and the final state  $x_T$ ,  
 588  $T$  is the finite amount of time given to reach the final state, and  $\rho$  is the relative weighting  
 589 between the cost associated with the length of the transition trajectory and the input control  
 590 energy. Following a previous benchmarking study<sup>37</sup>, we set  $T = 3$  and  $\rho = 1$ , allowing 1000  
 591 steps of transition from the initial state to the final state. To minimize the unintended energy cost  
 592 on regulating the regions of no interest (*i.e.*, those outside of the target ICN), we applied a  
 593 constraint matrix  $S$ , which is a  $N \times N$  binary diagonal matrix that selects only regions that are  
 594 members of the target ICN. Accordingly, the term  $(x_T - x(t))^T S(x_T - x(t))$  specifically  
 595 constrains the trajectories of all regions within the target ICN, and the term  $u(t)^T u(t)$  constrains  
 596 the amount of control energy used to reach the final state. The cost function  $J(u(t)^*)$  is used to  
 597 solve the unique optimal control input  $u(t)^*$ . Specifically, we define a Hamiltonian as:

$$598 \quad H(p, x, u, t) = (x_T - x)^T S(x_T - x) + \rho u^T u + p(Ax + Bu). \quad (4)$$

600 According to the Pontryagin minimization principle<sup>96</sup>, if  $u^*$  is a solution with the optimal  
 601 trajectory  $x^*$ , then there exists a  $p^*$  such that:

$$602 \quad \begin{aligned} 603 \quad \frac{\partial H}{\partial x} &= -2S(x_T - x^*) + A^T p^* = -\dot{p}^*, \\ 604 \quad \frac{\partial H}{\partial p} &= Ax^* + Bu, \\ 605 \quad \frac{\partial H}{\partial u} &= 2\rho u^* + B^T p^* = 0. \end{aligned} \quad (5)$$

606 From this set of equations, we can derive that:

$$607 \quad u^* = -\frac{1}{2\rho} B^T p^*, \quad (6)$$

$$608 \quad \dot{x}^* = Ax^* - \frac{1}{2\rho} BB^T p^*, \quad (7)$$

611 which can be reduced to:

$$612 \quad \begin{bmatrix} \dot{x}^* \\ \dot{p}^* \end{bmatrix} = \begin{bmatrix} A & -\frac{1}{2\rho} BB^T \\ -2S & -A^T \end{bmatrix} \begin{bmatrix} x^* \\ p^* \end{bmatrix} + \begin{bmatrix} 0 \\ 2S \end{bmatrix} x_T. \quad (8)$$

614 If we denote:

$$615 \quad \tilde{A} = \begin{bmatrix} A & -\frac{1}{2\rho} BB^T \\ -2S & -A^T \end{bmatrix},$$

616 
$$\tilde{x} = \begin{bmatrix} x^* \\ p^* \end{bmatrix},$$

617 
$$\tilde{b} = \begin{bmatrix} 0 \\ 2S \end{bmatrix} x_T,$$

618 then this reduced equation (8) can be rewritten as:

619 
$$\dot{\tilde{x}} = \tilde{A}\tilde{x} + \tilde{b},$$

620 and can be solved as:

622 
$$\tilde{x}(t) = e^{\tilde{A}t}\tilde{x}(0) + \tilde{A}^{-1}(e^{\tilde{A}t} - I)\tilde{b}.$$
  
621 (9)

623 Then, by fixing  $t = T$ , we arrive at:

625 
$$\tilde{x}(T) = e^{\tilde{A}T}\tilde{x}(0) + \tilde{A}^{-1}(e^{\tilde{A}T} - I)\tilde{b}.$$
  
624 (10)

626 We let:

627 
$$c = \tilde{A}^{-1}(e^{\tilde{A}T} - I)\tilde{b},$$
  
628 
$$e^{\tilde{A}T} = \begin{bmatrix} E_{11} & E_{12} \\ E_{21} & E_{22} \end{bmatrix},$$

629 so that equation (10) can be rewritten as:

631 
$$\begin{bmatrix} x^*(T) \\ p^*(T) \end{bmatrix} = \begin{bmatrix} E_{11} & E_{12} \\ E_{21} & E_{22} \end{bmatrix} \begin{bmatrix} x^*(0) \\ p^*(0) \end{bmatrix} + \begin{bmatrix} c_1 \\ c_2 \end{bmatrix},$$

630 from which we can obtain:

633 
$$x^*(T) = E_{11}x^*(0) + E_{12}p^*(0) + c_1.$$
  
632 (11)

634 Moreover, if we let  $\bar{S} = I - S$ , then as a known result in optimal control theory<sup>24</sup>,  $\bar{S}p^*(T) = 0$ .

635 Therefore,

637 
$$\bar{S}p^*(T) = \bar{S}E_{21}x^*(0) + \bar{S}E_{22}p^* + \bar{S}c_2 = 0.$$
  
636 (12)

638 Finally,  $p^*(0)$  can be solved for as follows:

640 
$$p^*(0) = \begin{bmatrix} SE_{12} \\ \bar{S}E_{22} \end{bmatrix}^+ \left( - \begin{bmatrix} SE_{11} \\ \bar{S}E_{21} \end{bmatrix} x^*(0) - \begin{bmatrix} Sc_1 \\ \bar{S}c_2 \end{bmatrix} + \begin{bmatrix} Sx(T) \\ 0 \end{bmatrix} \right),$$
  
639 (13)

641 where  $[\cdot]^+$  indicates the Moore-Penrose pseudoinverse of a matrix. Now that we have obtained  
642  $p^*(0)$ , we can use it and  $x(0)$  to solve for  $\tilde{x}$  via forward integration based on equation (9). To  
643 solve for  $u^*$ , we take  $p^*$  from our solution for  $\tilde{x}$  and solve equation (6). In particular, the optimal  
644 control energy injected at each region  $i$  can be defined as:

646 
$$E_i^* = \int_0^T \|u_i^*(t)\|^2 dt,$$
  
645 (14)

647 or given in total:

648 
$$E_{opt}^* = \sum_{i=1}^m E_i^* = \int_0^T u^*(t)^\top u^*(t) dt.$$



649 (15)

650 This total optimal control energy consumption  $E_{opt}^*$  is then used as a measure of efficiency of the  
 651 structural brain network during specific ICN activations.

652 *Simulation IIa: Between ICN transitions*

653 In our second simulation, we investigated the regional energetic consumption associated with  
 654 facilitating brain dynamics. While it is computationally impossible to simulate all brain  
 655 transitions, we considered two sets of finite repositories instead. First, we used the 8 ICN-defined  
 656 representative brain states (*i.e.*, the  $x_T$  in *Simulation I*), and explored all the possible transitions  
 657 among them<sup>36</sup>. Counting scenarios of both reciprocal transitions and single state persistence (*i.e.*,  
 658  $x_0 = x_T$ ), this simulation resulted in a total of 64 control tasks. Considering the linear nature of  
 659 our dynamical model, theoretically any possible transition can be written as a linear combination  
 660 of the proposed transitions<sup>36</sup>. Thus, this simulation is generally relevant to all transitions  
 661 represented during common brain dynamics.

662 We further alleviated the constraint on the length of the transition trajectory in our model, to  
 663 allow the brain to travel more freely across different intermediate states. Specifically, we adopted  
 664 a subform of the optimal control framework, namely the minimal control energy, which can be  
 665 obtained by letting  $\rho \rightarrow \infty$  in equation (3), so that the cost function  $J$  accounts only for the  
 666 control input to facilitate the designated transition regardless of the trajectory<sup>37</sup>. Accordingly, the  
 667 minimal control energy during the state transition from an initial state ( $x(0) = x_0$ ) to the final  
 668 state ( $x(T) = x_T$ ) over the time horizon  $T$  can be described as<sup>4,27,37</sup>:

$$670 \quad u(t)^* = \underset{u}{\operatorname{argmin}} J(u) = \underset{u}{\operatorname{argmin}} \int_0^T u(t)^\top u(t) dt. \quad (16)$$

671 To solve the minimal control energy  $u(t)^*$  this time, we compute the controllability Gramian  $W$   
 672 for controlling the network  $A$  from the control node set  $B$  in equation (1) as:

$$674 \quad W = \int_0^T e^{A(T-t)} B B^\top e^{A^\top(T-t)} dt, \quad (17)$$

675 where, as defined previously,  $A$  is the normalized  $N \times N$  structural brain network,  $B$  is a  $N \times N$   
 676 identity matrix setting all the brain parcels as control nodes, and  $T$  is the finite time horizon of  
 677 the transition trajectory. Similarly, we set  $T = 3$  and allow for 1000 steps of transition from the  
 678 initial state to the final state following Ref.<sup>37</sup>. Then, the  $u(t)^*$  can be computed as:

$$680 \quad u(t)^* = B^\top e^{A^\top(T-t)} W^{-1} (x(T) - e^{AT} x(0)), \quad (18)$$

681 and the minimal control energy injected at each region  $i$  can be calculated based on equation (14).

682 Finally, for each brain region, we averaged their minimal control energy across the 64 control  
 683 tasks as a measure of their individual energetic consumption during dynamics among known  
 684 ICNs.

685 *Simulation IIb: Random brain state transitions*

686 The second set of finite repositories of brain states included 100,000 pairs of randomly  
687 generated initial and final brain states  $x_{rand}$  with a Gaussian distribution at  $mean(x_{rand}) = 1$   
688 and  $std(x_{rand}) = 0.1^{26}$ . Accordingly, this simulation resulted in a total of 100,000 control tasks,  
689 which served as an approximation of all transitions when no prior preference of brain states is  
690 explicitly defined. Based on our previous argument of the linear nature of the model, we were  
691 not expecting significant difference between our previous *Simulation IIa* and this *Simulation IIb*.  
692 Rather, we expected to observe a consistency between the two, which would serve as a  
693 validation of *Simulation IIa*. Similarly, we adopted the same minimal control framework, and for  
694 each brain region, we calculated and summarized their minimal control energy across the  
695 100,000 control tasks as the measure of their individual energetic consumption during brain  
696 dynamics among randomly organized brain networks.

697 ***Statistical Inferences***

698 Comparisons for common demographic and clinical information were made with standard  
699 parametric tests such as an independent *t*-test or Chi-Square test, conducted using IBM® SPSS®  
700 v25. The alpha level was set at  $P < 0.05$  for both parametric and nonparametric tests.

701 *Confounding factor regression*

702 To minimize the influence of individual variances of the demographic characteristics and  
703 imaging data qualities (**Table 1**), confounding factor regressions were applied before statistical  
704 inferences on our neuroimaging data. Specifically, for derivatives from all imaging modalities, 4  
705 potential confounding factors were identified and included in the models: age, sex, handedness,  
706 and total intracranial volume. Furthermore, additional confounding factors were added to the  
707 models for different modalities: (i) for HARDI derivatives (*i.e.*, control energy), the neighboring  
708 correlation, mean framewise displacement, matrix density, and total weight were added; (ii) for  
709 T1w derivatives (*i.e.*, regional gray matter volume), the image quality rating was added; (iii) for  
710 FDG-PET derivatives (*i.e.*, regional glucose uptake), the PET scanner model was added. For each  
711 modality, all confounding factors were regressed out from their derivatives with one linear  
712 regression model, and the residuals were taken for subsequent statistical analyses.

713 *Permutation-based Nonparametric Statistical Testing*

714 To minimize the bias of the data distribution to our statistical inference and to correct for  
715 multiple comparisons, we implemented a permutation-based method as our main statistical  
716 strategy<sup>41</sup>. Individual permutation-based statistical testing allows inference of the probability of  
717 the observed statistic (*e.g.*, *t*-value), from a distribution of the same statistic estimated from  
718 massive instances of the same samples with their group identities permuted<sup>97</sup>. In many cases, we  
719 wish to apply a permutation-based test to scenarios with multiple comparisons, *i.e.*, comparing  
720 multiple within-subject variables across the same groups of subjects. In this case, we can expand  
721 the traditional approach by applying a “ $t_{max}$ ” principle to adjust the estimated *P*-values of each  
722 variable for multiple comparisons by controlling the family-wise error rate<sup>42</sup>. Briefly, the  
723 observed statistic for each variable is compared to the distribution of the most extreme statistic  
724 across the entire family of tests for each possible permutation. This procedure corrects for

725 multiple comparisons, because the distribution of the most extreme statistics automatically  
726 adjusts to reflect the increased chance of false discoveries due to an increased number of  
727 comparisons<sup>41</sup>. We performed 1,000,000 permutations each time to ensure high precision during  
728 *P*-value estimation<sup>44</sup>. This strategy was applied on all analyses (*i.e.*, *t*-tests, product-moment  
729 correlation) when multiple comparison correction was required.

730 To increase statistical power<sup>38,43,44</sup>, the regional control energy values of the right TLE  
731 patients were flipped left to right, allowing all statistical analyses to be conducted in accordance  
732 with the site of ictal onset (left, ipsilateral; right, contralateral). However, as there was no way to  
733 flip HC data to match the ipsilateral versus contralateral side in the right TLE patients, we  
734 instead calculated the deviation score of regional energy [ $Z_{pat} = (E_{pat} - \mu_{con})/\sigma_{con}$ , where  
735  $\mu_{con}$  and  $\sigma_{con}$  were the mean and standard deviation of the same regional energy from the HC]  
736 for each patient at each hemisphere, and flipped the Z-score of right TLE afterwards<sup>38,44,45</sup>. Then,  
737 Z-scores were evaluated via a permutation-based one-sample *t*-test.

### 738 *Permutation-based Mediation Analysis*

739 To disentangle the associations among regional gray matter volume change, glucose  
740 metabolism and control energy consumption in the hippocampus, we applied a mediation  
741 analysis to test the hypothesis that the regional metabolic baseline, as a measure of functional  
742 integrity, mediates the relationship between local structural integrity and energetic efficiency.  
743 After confound regression, we generated the laterality indices for gray matter volume, glucose  
744 uptake, and minimal control energy estimated during cross-ICN transitions. We then evaluated  
745 the significance of the indirect effect using bootstrapped confidence intervals via the  
746 MediationToolbox<sup>98</sup>. Specifically, we examined: (i) path c: the total effect of the LI of gray  
747 matter volume on the LI of minimal control energy; (ii) path a: the relationship between the LI of  
748 gray matter volume and the LI of glucose uptake; (iii) path b: the relationship between the LI of  
749 glucose uptake and the LI of minimal control energy; and (iv) path c': the direct effect of the LI  
750 of gray matter volume on the LI of minimal control energy while controlling for the mediator (LI  
751 of glucose uptake). The mediation/indirect effect a\*b is the effect size of the relationship  
752 between the LI of gray matter volume and the LI of minimal control energy that was reduced  
753 after controlling for the mediator (LI of glucose uptake). For each path, we calculated the beta  
754 coefficient, which reflected the changes of the outcome for every one-unit change in the  
755 predictor. A bootstrap analysis (*i.e.*, resampled 1,000,000 times) was implemented to estimate  
756 the confidence intervals for the indirect effect.

### 757 *Data availability*

758 The data are available from the authors upon reasonable request.

### 759 *Code availability*

760 All codes are available from the authors upon reasonable request.

## 761 **References**

- 762 1. Kupis, L. *et al.* Brain Dynamics Underlying Cognitive Flexibility Across the Lifespan.  
763 *Cereb. Cortex* (2021) doi:10.1093/cercor/bhab156.

- 764 2. Geerligs, L., van Gerven, M. & Güçlü, U. Detecting neural state transitions underlying  
765 event segmentation. *Neuroimage* **236**, (2021).
- 766 3. Lankinen, K. *et al.* Consistency and similarity of MEG- and fMRI-signal time courses  
767 during movie viewing. *Neuroimage* **173**, 361–369 (2018).
- 768 4. Cornblath, E. J. *et al.* Temporal sequences of brain activity at rest are constrained by white  
769 matter structure and modulated by cognitive demands. *Commun. Biol.* **3**, (2020).
- 770 5. Ju, H. & Bassett, D. S. Dynamic representations in networked neural systems. *Nature*  
771 *Neuroscience* vol. 23 908–917 (2020).
- 772 6. Raichle, M. E. & Gusnard, D. A. Appraising the brain’s energy budget. *Proc. Natl. Acad.*  
773 *Sci.* **99**, 10237–10239 (2002).
- 774 7. Fisher, R. S. *et al.* Epileptic Seizures and Epilepsy: Definitions Proposed by the  
775 International League Against Epilepsy (ILAE) and the International Bureau for Epilepsy  
776 (IBE). *Epilepsia* **46**, 470–472 (2005).
- 777 8. Blumenfeld, H. *et al.* Positive and Negative Network Correlations in Temporal Lobe  
778 Epilepsy. *Cereb. Cortex* **14**, 892–902 (2004).
- 779 9. Blumenfeld, H. *et al.* Cortical and subcortical networks in human secondarily generalized  
780 tonic–clonic seizures. *Brain* **132**, 999–1012 (2009).
- 781 10. Elger, C. E., Helmstaedter, C. & Kurthen, M. Chronic epilepsy and cognition. *Lancet*  
782 *Neurology* vol. 3 663–672 (2004).
- 783 11. Zarcone, D. & Corbetta, S. Shared mechanisms of epilepsy, migraine and affective  
784 disorders. *Neurol. Sci.* **38**, 73–76 (2017).
- 785 12. Tellez-Zenteno, J. F., Patten, S. B., Jetté, N., Williams, J. & Wiebe, S. Psychiatric  
786 comorbidity in epilepsy: A population-based analysis. *Epilepsia* **48**, 2336–2344 (2007).
- 787 13. Glosser, G., Zvil, A. S., Glosser, D. S., O’Connor, M. J. & Sperling, M. R. Psychiatric  
788 aspects of temporal lobe epilepsy before and after anterior temporal lobectomy. *J. Neurol.*  
789 *Neurosurg. Psychiatry* **68**, 53–58 (2000).
- 790 14. Caciagli, L., Bernhardt, B. C., Hong, S. J., Bernasconi, A. & Bernasconi, N. Functional  
791 network alterations and their structural substrate in drug-resistant epilepsy. *Frontiers in*  
792 *Neuroscience* vol. 8 (2014).
- 793 15. Tavakol, S. *et al.* Neuroimaging and connectomics of drug-resistant epilepsy at multiple  
794 scales: From focal lesions to macroscale networks. *Epilepsia* **60**, 593–604 (2019).
- 795 16. Larivière, S., Bernasconi, A., Bernasconi, N. & Bernhardt, B. C. Connectome biomarkers  
796 of drug-resistant epilepsy. *Epilepsia* **62**, 6–24 (2021).
- 797 17. Chassoux, F. *et al.* Determinants of brain metabolism changes in mesial temporal lobe  
798 epilepsy. *Epilepsia* **57**, 907–919 (2016).
- 799 18. Reyes, A. *et al.* Cognitive phenotypes in temporal lobe epilepsy are associated with  
800 distinct patterns of white matter network abnormalities. *Neurology* **92**, E1957–E1968  
801 (2019).
- 802 19. Laurent, A. *et al.* Metabolic correlates of cognitive impairment in mesial temporal lobe  
803 epilepsy. *Epilepsy Behav.* **105**, (2020).
- 804 20. Hermann, B. *et al.* Network, clinical and sociodemographic features of cognitive  
805 phenotypes in temporal lobe epilepsy. *NeuroImage Clin.* **27**, (2020).
- 806 21. He, X. *et al.* Disrupted dynamic network reconfiguration of the language system in  
807 temporal lobe epilepsy. *Brain* **141**, 1375–1389 (2018).
- 808 22. Banjac, S. *et al.* Reconfiguration dynamics of a language-and-memory network in healthy  
809 participants and patients with temporal lobe epilepsy. *NeuroImage Clin.* **31**, 102702

- 810 (2021).
- 811 23. Girardi-Schappo, M. *et al.* Altered communication dynamics reflect cognitive deficits in  
812 temporal lobe epilepsy. *Epilepsia* **62**, 1022–1033 (2021).
- 813 24. Bryson, A. E. Optimal Control-1950 to 1985. *IEEE Control Syst.* **16**, 26–33 (1996).
- 814 25. Braun, U. *et al.* Brain network dynamics during working memory are modulated by  
815 dopamine and diminished in schizophrenia. *Nat. Commun.* **12**, (2021).
- 816 26. Cui, Z. *et al.* Optimization of energy state transition trajectory supports the development  
817 of executive function during youth. *Elife* **9**, 1–60 (2020).
- 818 27. Zöllner, D. *et al.* Structural control energy of resting-state functional brain states reveals  
819 less cost-effective brain dynamics in psychosis vulnerability. *Hum. Brain Mapp.* **42**,  
820 2181–2200 (2021).
- 821 28. Parkes, L. *et al.* Network Controllability in Transmodal Cortex Predicts Positive Psychosis  
822 Spectrum Symptoms. *Biol. Psychiatry* S0006-3223(21)01175–6 (2021)  
823 doi:10.1016/j.biopsych.2021.03.016.
- 824 29. Stiso, J. *et al.* White Matter Network Architecture Guides Direct Electrical Stimulation  
825 through Optimal State Transitions. *Cell Rep.* **28**, 2554–2566.e7 (2019).
- 826 30. Liu, X., Zhang, N., Chang, C. & Duyn, J. H. Co-activation patterns in resting-state fMRI  
827 signals. *NeuroImage* vol. 180 485–494 (2018).
- 828 31. Li, M. *et al.* Co-activation patterns across multiple tasks reveal robust anti-correlated  
829 functional networks. *Neuroimage* (2021) doi:10.1016/j.neuroimage.2020.117680.
- 830 32. Smith, S. M. *et al.* Correspondence of the brain’s functional architecture during activation  
831 and rest. *Proc. Natl. Acad. Sci. U. S. A.* **106**, 13040–13045 (2009).
- 832 33. Yeo, B. T. T. *et al.* The organization of the human cerebral cortex estimated by intrinsic  
833 functional connectivity. *J. Neurophysiol.* **106**, 1125–65 (2011).
- 834 34. Vatansever, D. *et al.* Varieties of semantic cognition revealed through simultaneous  
835 decomposition of intrinsic brain connectivity and behaviour. *Neuroimage* **158**, 1–11  
836 (2017).
- 837 35. Laird, A. R. *et al.* Behavioral interpretations of intrinsic connectivity networks. *J. Cogn.*  
838 *Neurosci.* **23**, 4022–4037 (2011).
- 839 36. Betzel, R. F., Gu, S., Medaglia, J. D., Pasqualetti, F. & Bassett, D. S. Optimally  
840 controlling the human connectome: the role of network topology. *Sci. Rep.* **6**, 30770  
841 (2016).
- 842 37. Karrer, T. M. *et al.* A practical guide to methodological considerations in the  
843 controllability of structural brain networks. *J. Neural Eng.* **17**, 26031 (2020).
- 844 38. Bernhardt, B. C. *et al.* Temporal lobe epilepsy: Hippocampal pathology modulates  
845 connectome topology and controllability. *Neurology* **92**, E2209–E2220 (2019).
- 846 39. Scanlon, C. *et al.* Grey and white matter abnormalities in temporal lobe epilepsy with and  
847 without mesial temporal sclerosis. *J. Neurol.* **260**, 2320–2329 (2013).
- 848 40. Gu, S. *et al.* Optimal trajectories of brain state transitions. *Neuroimage* **148**, 305–317  
849 (2017).
- 850 41. Groppe, D. M., Urbach, T. P. & Kutas, M. Mass univariate analysis of event-related brain  
851 potentials/fields I: A critical tutorial review. *Psychophysiology* **48**, 1711–1725 (2011).
- 852 42. Blair, R. C. & Karniski, W. An alternative method for significance testing of waveform  
853 difference potentials. *Psychophysiology* **30**, 518–24 (1993).
- 854 43. He, X. *et al.* Presurgical thalamic “hubness” predicts surgical outcome in temporal lobe  
855 epilepsy. *Neurology* **88**, 2285–2293 (2017).

- 856 44. He, X. *et al.* Disrupted basal ganglia-thalamocortical loops in focal to bilateral tonic-  
857 clonic seizures. *Brain* **143**, 175–190 (2020).
- 858 45. Liu, M., Bernhardt, B. C., Bernasconi, A. & Bernasconi, N. Gray matter structural  
859 compromise is equally distributed in left and right temporal lobe epilepsy. *Hum. Brain*  
860 *Mapp.* **37**, 515–524 (2016).
- 861 46. Newberg, A. B. *et al.* Ipsilateral and contralateral thalamic hypometabolism as a predictor  
862 of outcome after temporal lobectomy for seizures. *J. Nucl. Med.* **41**, 1964–1968 (2000).
- 863 47. Salanova, V. *et al.* FDG-PET and MRI in temporal lobe epilepsy: Relationship to febrile  
864 seizures, hippocampal sclerosis and outcome. *Acta Neurol. Scand.* **97**, 146–153 (1998).
- 865 48. Diehl, B. *et al.* Neocortical temporal FDG-PET hypometabolism correlates with temporal  
866 lobe atrophy in hippocampal sclerosis associated with microscopic cortical dysplasia.  
867 *Epilepsia* **44**, 559–564 (2003).
- 868 49. Aldenkamp, A. P. Effect of seizures and epileptiform discharges on cognitive function.  
869 *Epilepsia* **38**, S52–S55 (1997).
- 870 50. Sidhu, M. K. *et al.* A functional magnetic resonance imaging study mapping the episodic  
871 memory encoding network in temporal lobe epilepsy. *Brain* **136**, 1868–1888 (2013).
- 872 51. Voets, N. L. *et al.* Aberrant functional connectivity in dissociable hippocampal networks  
873 is associated with deficits in memory. *J. Neurosci.* **34**, 4920–4928 (2014).
- 874 52. Li, Q. *et al.* Atypical neural topographies underpin dysfunctional pattern separation in  
875 temporal lobe epilepsy. *Brain* (2021) doi:10.1093/brain/awab121.
- 876 53. Doucet, G. E., Skidmore, C., Sharan, A. D., Sperling, M. R. & Tracy, J. I. Functional  
877 connectivity abnormalities vary by amygdala subdivision and are associated with  
878 psychiatric symptoms in unilateral temporal epilepsy. *Brain Cogn.* **83**, 171–182 (2013).
- 879 54. Semah, F. *et al.* Is Interictal Temporal Hypometabolism Related to Mesial Temporal  
880 Sclerosis? A Positron Emission Tomography/Magnetic Resonance Imaging Confrontation.  
881 *Epilepsia* **36**, 447–456 (1995).
- 882 55. Galán, R. F. & Fernández Galán, R. On how network architecture determines the  
883 dominant patterns of spontaneous neural activity. *PLoS One* **3**, e2148 (2008).
- 884 56. Honey, C. J. *et al.* Predicting human resting-state functional connectivity from structural  
885 connectivity. *Proc. Natl. Acad. Sci. U. S. A.* **106**, 2035–2040 (2009).
- 886 57. Nozari, E. *et al.* Is the brain macroscopically linear? A system identification of resting  
887 state dynamics. *bioRxiv* 2020.12.21.423856 (2021) doi:10.1101/2020.12.21.423856.
- 888 58. Fiedler, B., Mochizuki, A., Kurosawa, G. & Saito, D. Dynamics and Control at Feedback  
889 Vertex Sets. I: Informative and Determining Nodes in Regulatory Networks. *J. Dyn.*  
890 *Differ. Equations* **25**, 563–604 (2013).
- 891 59. Zañudo, J. G. T., Yang, G., Albert, R. & Levine, H. Structure-based control of complex  
892 networks with nonlinear dynamics. *Proc. Natl. Acad. Sci. U. S. A.* **114**, 7234–7239 (2017).
- 893 60. Li, A., Cornelius, S. P., Liu, Y. Y., Wang, L. & Barabási, A. L. The fundamental  
894 advantages of temporal networks. *Science (80-. )*. **358**, 1042–1046 (2017).
- 895 61. Caciagli, L., Xiao, F., Wandschneider, B. & Koepp, M. J. Imaging Biomarkers of Anti-  
896 Epileptic Drug Action: Insights from Magnetic Resonance Imaging. *Curr. Pharm. Des.*  
897 **23**, 5727–5739 (2017).
- 898 62. Sperling, M. R. Temporal lobectomy for refractory epilepsy. *JAMA J. Am. Med. Assoc.*  
899 **276**, 470–475 (1996).
- 900 63. Tracy, J. I., Dechant, V., Sperling, M. R., Cho, R. & Glosser, D. The association of mood  
901 with quality of life ratings in epilepsy. *Neurology* **68**, 1101–7 (2007).

- 902 64. Pustina, D. *et al.* Predicting the laterality of temporal lobe epilepsy from PET, MRI, and  
903 DTI: A multimodal study: Predicting temporal lobe epilepsy laterality. *NeuroImage Clin.*  
904 **9**, 20–31 (2015).
- 905 65. Leiderman, D. B., Balish, M., Bromfield, E. B. & Theodore, W. H. Effect of Valproate on  
906 Human Cerebral Glucose Metabolism. *Epilepsia* **32**, 417–422 (1991).
- 907 66. Theodore, W. H. Spect and Pet in Epilepsy. *The Lancet* vol. 333 502–503 (1989).
- 908 67. Cieslak, M. *et al.* QSIPrep: an integrative platform for preprocessing and reconstructing  
909 diffusion MRI data. *Nat. Methods* **18**, 775–778 (2021).
- 910 68. Yeh, F. C., Wedeen, V. J. & Tseng, W. Y. I. Generalized q-sampling imaging. *IEEE*  
911 *Trans. Med. Imaging* **29**, 1626–1635 (2010).
- 912 69. Tournier, J. D. *et al.* MRtrix3: A fast, flexible and open software framework for medical  
913 image processing and visualisation. *NeuroImage* vol. 202 (2019).
- 914 70. Esteban, O. *et al.* fMRIPrep: a robust preprocessing pipeline for functional MRI. *Nat.*  
915 *Methods* **16**, 111–116 (2019).
- 916 71. Tustison, N. J. *et al.* N4ITK: Improved N3 bias correction. *IEEE Trans. Med. Imaging* **29**,  
917 1310–1320 (2010).
- 918 72. Avants, B. B., Epstein, C. L., Grossman, M. & Gee, J. C. Symmetric diffeomorphic image  
919 registration with cross-correlation: Evaluating automated labeling of elderly and  
920 neurodegenerative brain. *Med. Image Anal.* **12**, 26–41 (2008).
- 921 73. Zhang, Y., Brady, M. & Smith, S. Segmentation of brain MR images through a hidden  
922 Markov random field model and the expectation-maximization algorithm. *IEEE Trans.*  
923 *Med. Imaging* **20**, 45–57 (2001).
- 924 74. Cordero-Grande, L., Christiaens, D., Hutter, J., Price, A. N. & Hajnal, J. V. Complex  
925 diffusion-weighted image estimation via matrix recovery under general noise models.  
926 *Neuroimage* **200**, 391–404 (2019).
- 927 75. Kellner, E., Dhital, B., Kiselev, V. G. & Reiser, M. Gibbs-ringing artifact removal based  
928 on local subvoxel-shifts. *Magn. Reson. Med.* **76**, 1574–1581 (2016).
- 929 76. Wang, S. *et al.* Evaluation of field map and nonlinear registration methods for correction  
930 of susceptibility artifacts in diffusion MRI. *Front. Neuroinform.* **11**, (2017).
- 931 77. Treiber, J. M. *et al.* Characterization and correction of geometric distortions in 814  
932 Diffusion Weighted Images. *PLoS One* **11**, (2016).
- 933 78. Jenkinson, M. Improved Optimization for the Robust and Accurate Linear Registration  
934 and Motion Correction of Brain Images. *Neuroimage* **17**, 825–841 (2002).
- 935 79. Yeh, F. C. *et al.* Differential tractography as a track-based biomarker for neuronal injury.  
936 *Neuroimage* **202**, (2019).
- 937 80. Tournier, J. D., Calamante, F., Gadian, D. G. & Connelly, A. Direct estimation of the fiber  
938 orientation density function from diffusion-weighted MRI data using spherical  
939 deconvolution. *Neuroimage* **23**, 1176–1185 (2004).
- 940 81. Tournier, J. D. *et al.* Resolving crossing fibres using constrained spherical deconvolution:  
941 Validation using diffusion-weighted imaging phantom data. *Neuroimage* **42**, 617–625  
942 (2008).
- 943 82. Dhollander, T., Raffelt, D. & Connelly, A. Unsupervised 3-tissue response function  
944 estimation from single-shell or multi-shell diffusion MR data without a co-registered T1  
945 image. *ISMRM Work. Break. Barriers Diffus. MRI* **5** (2016).
- 946 83. Dhollander, T., Mito, R., Raffelt, D. & Connelly, A. Improved white matter response  
947 function estimation for 3-tissue constrained spherical deconvolution. *27th Int. Soc. Magn.*

- 948 *Reson. Med.* 555 (2019).
- 949 84. Raffelt, D. *et al.* Bias field correction and intensity normalisation for quantitative analysis  
950 of apparent fibre density. in *Proc. Intl. Soc. Mag. Reson. Med* vol. 25 3541 (2017).
- 951 85. Smith, R. E., Tournier, J. D., Calamante, F. & Connelly, A. Anatomically-constrained  
952 tractography: Improved diffusion MRI streamlines tractography through effective use of  
953 anatomical information. *Neuroimage* **62**, 1924–1938 (2012).
- 954 86. Smith, R. E., Tournier, J. D., Calamante, F. & Connelly, A. SIFT2: Enabling dense  
955 quantitative assessment of brain white matter connectivity using streamlines tractography.  
956 *Neuroimage* **119**, 338–351 (2015).
- 957 87. Cammoun, L. *et al.* Mapping the human connectome at multiple scales with diffusion  
958 spectrum MRI. *J. Neurosci. Methods* **203**, 386–397 (2012).
- 959 88. Desikan, R. S. *et al.* An automated labeling system for subdividing the human cerebral  
960 cortex on MRI scans into gyral based regions of interest. *Neuroimage* **31**, 968–980 (2006).
- 961 89. Schaefer, A. *et al.* Local-Global Parcellation of the Human Cerebral Cortex from Intrinsic  
962 Functional Connectivity MRI. *Cereb. Cortex* **28**, 3095–3114 (2018).
- 963 90. De Blasi, B. *et al.* Age-specific 18F-FDG image processing pipelines and analysis are  
964 essential for individual mapping of seizure foci in pediatric patients with intractable  
965 epilepsy. *J. Nucl. Med.* **59**, 1590–1596 (2018).
- 966 91. Manjón, J. V., Coupé, P., Martí-Bonmatí, L., Collins, D. L. & Robles, M. Adaptive non-  
967 local means denoising of MR images with spatially varying noise levels. *J. Magn. Reson.*  
968 *Imaging* **31**, 192–203 (2010).
- 969 92. Ashburner, J. & Friston, K. J. Unified segmentation. *Neuroimage* **26**, 839–851 (2005).
- 970 93. Rajapakse, J. C., Giedd, J. N. & Rapoport, J. L. Statistical approach to segmentation of  
971 single-channel cerebral mr images. *IEEE Trans. Med. Imaging* **16**, 176–186 (1997).
- 972 94. Tohka, J., Zijdenbos, A. & Evans, A. Fast and robust parameter estimation for statistical  
973 partial volume models in brain MRI. *Neuroimage* **23**, 84–97 (2004).
- 974 95. Ashburner, J. & Friston, K. J. Diffeomorphic registration using geodesic shooting and  
975 Gauss-Newton optimisation. *Neuroimage* **55**, 954–967 (2011).
- 976 96. Boltyanski, V. G., Gamkrelidze, R. V., Mishchenko, E. F. & Pontryagin, L. S. The  
977 maximum principle in the theory of optimal processes of control. *IFAC Proc. Vol.* **1**, 464–  
978 469 (1960).
- 979 97. Good, P. I. *Permutation, parametric and bootstrap tests of hypotheses.* (Springer, 2005).
- 980 98. Wager, T. MediationToolbox (<https://github.com/canlab/MediationToolbox>), GitHub.  
981 (2021).
- 982 99. Gaser, C. & Dahnke, R. CAT - A computational anatomy toolbox for the analysis of  
983 structural MRI data. in *22nd Annual Meeting of the Organization For Human Brain*  
984 *Mapping* (2016).
- 985 100. Caciagli, L. *et al.* Thalamus and focal to bilateral seizures: A multiscale cognitive imaging  
986 study. *Neurology* **95**, e2427–e2441 (2020).

## 987 **Figures Captions**

988 **Figure 1. Schematic of methods.** (a) Based on a simplified noise-free, linear, continuous-time,  
989 and time-invariant model of neural dynamics, we simulate energetic processes during brain state  
990 transitions instantiated upon and constrained by the structural connectome (matrix A). Two types  
991 of control energy (a quadratic function of  $u$ ) are depicted: the minimum control energy required  
992 to drive the brain from an initial state  $[x(0)]$  to a final state  $[x(T)]$  using a specific set of control



993 nodes (whole brain, matrix B); the optimal control energy additionally constrains the length of  
994 the trajectory between states. (b) Eight preferential brain states are defined according to the  
995 known intrinsic connectivity networks (ICN)<sup>32,33</sup>. Within each state, regions from a specific ICN  
996 are activated at a magnitude of 1, whereas the rest of the brain remains at 0 (inactivated). These  
997 preferential brain states constitute the initial and final states of our simulations. (c) We then  
998 simulate the energetic inputs required to activate each of the preferential brain states from a  
999 theoretical baseline (*i.e.*, activity magnitude of 0). Next, we estimate the optimal control energy  
1000 consumed during each of the activation processes across the whole brain for each subject. (d) We  
1001 also simulate transitions between preferential brain states, and estimate the minimal control  
1002 energy consumed at each brain region for each subject. Abbreviations: VIS, visual network;  
1003 SMN, somatomotor network; DAN, dorsal attention network; SAL/VAN, salience/ventral  
1004 attention network; CONT, executive control network; DMN, default mode network; SUB,  
1005 subcortical network.

1006 **Figure 2. Global optimal control energy (OCE) estimated during simulated activation of**  
1007 **intrinsic connectivity networks.** After correction for multiple comparisons, significant group  
1008 differences were only found for the simulated activation of the limbic network (LIM), which  
1009 demanded more global OCE in patients with temporal lobe epilepsy (TLE) compared to healthy  
1010 controls (HC). Other abbreviations: VIS, visual network; SMN, somatomotor network; DAN,  
1011 dorsal attention network; SAL/VAN, salience/ventral attention network; CONT, executive  
1012 control network; DMN, default mode network; SUB, subcortical network. \*\*,  $P_{\text{corr}} < 0.01$ . The  
1013 central mark indicates the median, and the bottom and top edges of the box indicate the 25<sup>th</sup> and  
1014 75<sup>th</sup> percentiles, respectively.

1015 **Figure 3. Global optimal control energy (OCE) estimated during a simulated transition**  
1016 **from the baseline to a final state where only one side of the limbic network (LIM) is**  
1017 **activated.** When the target was set to the left hemispheric LIM, only left temporal lobe epilepsy  
1018 patients (LTLE) needed more energy than the other two groups. When the target was set to the  
1019 right hemispheric LIM, only right TLE patients (RTLE) needed more energy than the other two  
1020 groups. Other abbreviations: HC, healthy controls. \*,  $P_{\text{Bonferroni}} < 0.05$ , \*\*,  $P_{\text{Bonferroni}} < 0.01$ , \*\*\*,  
1021  $P_{\text{Bonferroni}} < 0.001$ . The central mark indicates the median, and the bottom and top edges of the box  
1022 indicate the 25<sup>th</sup> and 75<sup>th</sup> percentiles, respectively.

1023 **Figure 4. Regional energy efficiency differences between temporal lobe epilepsy (TLE)**  
1024 **patients and healthy controls (HC).** (a) We estimated the minimal control energy consumption  
1025 of each region during all transitions between the brain states defined by intrinsic connectivity  
1026 networks (ICNs). In the hemisphere ipsilateral to the seizure focus, we found significantly higher  
1027 energy consumption in TLE patients than in HC among several temporo-limbic regions. (b) We  
1028 then estimated the minimal control energy consumption of each region during transitions  
1029 between 100,000 pairs of initial [ $x(0)$ ] and final states [ $x(T)$ ] with randomly generated activity  
1030 magnitudes. Concordant results were found, showing that the patients needed significantly  
1031 higher control energy in the ipsilateral temporo-limbic regions. The box plots depict the  
1032 deviation scores (Z) of energy consumption of TLE patients in reference to HC. Only regions

1033 with significant group differences after multiple comparison corrections are displayed, including  
 1034 the isthmus of the cingulate gyrus (Isthmuscingulate-1), fusiform (Fusiform-2), temporal pole  
 1035 (Temporale-1), inferior temporal gyrus (Inferiortemporal-1), parahippocampal gyrus  
 1036 (Parahippocampal-1), amygdala, and hippocampus.

1037 **Figure 5. Regional control energy consumption is associated with glucose metabolism in**  
 1038 **temporal lobe epilepsy patients.** (a) Multiple comparisons corrected one sample *t*-tests on  
 1039 laterality indices (LI) of regional glucose uptake reveal widespread ipsilateral hypometabolism in  
 1040 reference to the metabolic levels in the contralateral hemisphere (upper panel). Notably, all the  
 1041 ipsilateral temporo-limbic regions with atypical energetic profiles also present with  
 1042 hypometabolism (lower panel). (b-h) Pearson correlations corrected for multiple comparisons  
 1043 revealed significant associations between the laterality of glucose uptake and minimal control  
 1044 energy consumption during all the transitions between the states defined by intrinsic connectivity  
 1045 networks (ICN), most prominently in the limbic regions, whereas the side with lower glucose  
 1046 metabolic baseline consumes more control energy. Corrected *P*-values ( $P_{\text{corr}}$ ) are depicted. (i) A  
 1047 mediation analysis is performed on the hippocampus, where the association between the  
 1048 laterality of gray matter volume (LI-Vol) and control energy (LI-CE) is also found to be  
 1049 significant. We found that the laterality of glucose uptake (LI-Glu) provides a full mediation of  
 1050 the association between the former two variables. The significance of the mediation effect was  
 1051 assessed using bootstrapped confidence intervals.

## 1052 Tables

1053 **Table 1.** Sample demographic and clinical characteristics.

| Experimental Group (N)                            | TLE (60)    | HC (50)     | $T/\chi^2$   | <i>P</i>     |
|---------------------------------------------------|-------------|-------------|--------------|--------------|
| Age                                               | 41.13±14.41 | 37.98±11.78 | 1.24         | 0.218        |
| Sex (Male/Female)                                 | 34/26       | 26/24       | 0.24         | 0.625        |
| Handedness (Right/Left)                           | 51/9        | 42/8        | 0.02         | 0.885        |
| T1-Weighted Image Quality                         |             |             |              |              |
| <i>Image Quality Rating</i>                       | 0.858±0.006 | 0.859±0.006 | -1.13        | 0.260        |
| <i>Total Intracranial Volume (cm<sup>3</sup>)</i> | 1417±150    | 1416±143    | 0.04         | 0.969        |
| HARDI Image Quality                               |             |             |              |              |
| <i>Neighboring Correlation</i>                    | 0.795±0.013 | 0.795±0.015 | -0.31        | 0.754        |
| <i>Mean Framework Displacement</i>                | 0.375±0.155 | 0.343±0.132 | 1.16         | 0.251        |
| Structural Network Properties                     |             |             |              |              |
| <i>Matrix Density</i>                             | 0.895±0.045 | 0.911±0.045 | -1.79        | 0.076        |
| <i>Matrix Total Weight (log<sub>10</sub>(·))</i>  | 7.078±0.018 | 7.086±0.014 | <b>-2.58</b> | <b>0.011</b> |
| Seizure Focus (LT/RT)                             | 38/22       |             |              |              |
| Age at Epilepsy Onset (year)                      | 25.28±15.59 |             |              |              |
| Duration of Epilepsy (year)                       | 15.85±16.46 |             |              |              |
| Temporal Pathology (NB/HS/Other)                  | 15/27/18    |             |              |              |
| Frequency of FIAS (num. per month)                | 9.28±16.41  |             |              |              |

---

|                                              |          |
|----------------------------------------------|----------|
| FBTCS History ( <i>none/remote/current</i> ) | 19/16/25 |
| Seizure Type                                 |          |
| <i>FIAS</i>                                  | 9        |
| <i>FAS</i>                                   | 1        |
| <i>FIAS/FAS</i>                              | 9        |
| <i>FIAS+FBTCS</i>                            | 22       |
| <i>FAS+FBTCS</i>                             | 1        |
| <i>FIAS/FAS+FBTCS</i>                        | 14       |
| <i>FBTCS</i>                                 | 4        |
| Num. of current AEDs (1/2/3)                 | 27/26/7  |

---

1054 Continuous variables were presented as mean  $\pm$  standard deviation. Abbreviations and  
1055 definitions: TLE, patients with temporal lobe epilepsy; HC, healthy controls; HARDI, high  
1056 angular resolution diffusion imaging; FIAS, focal impaired awareness seizure; FAS, focal aware  
1057 seizure; FBTCS, focal to bilateral tonic-clonic seizure; AED, anti-epileptic drug. The quality of  
1058 T1-weighted images was assessed with an image quality rating and the total intracranial volume  
1059 produced with the Computational Anatomy Toolbox (CAT12)<sup>99</sup>. The quality of HARDI data was  
1060 assessed with a neighboring correlation index<sup>79</sup> which quantified the similarity between low-b  
1061 volumes with similar gradient directions, as well as with the mean framewise displacement<sup>78</sup> as a  
1062 measure of head motion. Seizure focus was classified as: left temporal (LT) and right temporal  
1063 (RT). Temporal pathology was diagnosed by neuroradiologists based on presurgical MRI scans  
1064 as: normal brain MRI (NB); hippocampal sclerosis (HS); other pathologies (Other), such as  
1065 tumor, focal cortical dysplasia, encephalocele, etc. FBTCS history was sorted as: *none*, patients  
1066 who had never had any FBTCS events during their lifetime; *remote*, patients who had  
1067 experienced FBTCS in the past, but none for one year or more prior to scanning; *current*,  
1068 patients who had recurrent FBTCS within one year prior to scanning<sup>44,100</sup>. For continuous  
1069 variables, independent *t*-tests were conducted. For categorical variables, chi-square tests were  
1070 conducted. Significant differences were highlighted in bold.

## 1071 Citation diversity statement

1072 Recent work in several fields of science has identified a bias in citation practices such that  
1073 papers from women and other minority scholars are under-cited relative to the number of such  
1074 papers in the field<sup>1-9</sup>. Here we sought to proactively consider choosing references that reflect the  
1075 diversity of the field in thought, form of contribution, gender, race, ethnicity, and other factors.  
1076 First, we obtained the predicted gender of the first and last author of each reference by using  
1077 databases that store the probability of a first name being carried by a woman<sup>5, 10</sup>. By this measure  
1078 (and excluding self-citations to the first and last authors of our current paper), our references  
1079 contain 7.41% woman(first)/woman(last), 18.52% man/woman, 18.52% woman/man, and  
1080 55.56% man/man. This method is limited in that a) names, pronouns, and social media profiles  
1081 used to construct the databases may not, in every case, be indicative of gender identity and b) it  
1082 cannot account for intersex, non-binary, or transgender people. Second, we obtained predicted

1083 racial/ethnic category of the first and last author of each reference by databases that store the  
1084 probability of a first and last name being carried by an author of color<sup>11, 12</sup>. By this measure (and  
1085 excluding self-citations), our references contain 9.79% author of color (first)/author of  
1086 color(last), 12.4% white author/author of color, 25.2% author of color/white author, and 52.62%  
1087 white author/white author. This method is limited in that a) names and Florida Voter Data to  
1088 make the predictions may not be indicative of racial/ethnic identity, and b) it cannot account for  
1089 Indigenous and mixed-race authors, or those who may face differential biases due to the  
1090 ambiguous racialization or ethnicization of their names. We look forward to future work that  
1091 could help us to better understand how to support equitable practices in science.

1092 References:

- 1093 [1] S. M. Mitchell, S. Lange, and H. Brus, “Gendered citation patterns in international relations  
1094 journals,” *International Studies Perspectives*, vol. 14, no. 4, pp. 485–492, 2013.
- 1095 [2] D. Maliniak, R. Powers, and B. F. Walter, “The gender citation gap in international  
1096 relations,” *International Organization*, vol. 67, no. 4, pp. 889–922, 2013.
- 1097 [3] N. Caplar, S. Tacchella, and S. Birrer, “Quantitative evaluation of gender bias in  
1098 astronomical publications from citation counts,” *Nature Astronomy*, vol. 1, no. 6, p. 0141, 2017.
- 1099 [4] M. L. Dion, J. L. Sumner, and S. M. Mitchell, “Gendered citation patterns across political  
1100 science and social science methodology fields,” *Political Analysis*, vol. 26, no. 3, pp. 312–327,  
1101 2018.
- 1102 [5] J. D. Dworkin, K. A. Linn, E. G. Teich, P. Zurn, R. T. Shinohara, and D. S. Bassett, “The  
1103 extent and drivers of gender imbalance in neuroscience reference lists,” *Nature Neuroscience*,  
1104 2020.
- 1105 [6] M. A. Bertolero, J. D. Dworkin, S. U. David, C. L. Lloreda, P. Srivastava, J. Stiso, D. Zhou,  
1106 K. Dzirasa, D. A. Fair, A. N. Kaczkurkin, B. J. Marlin, D. Shohamy, L. Q. Uddin, P. Zurn, and  
1107 D. S. Bassett, “Racial and ethnic imbalance in neuroscience reference lists and intersections with  
1108 gender,” *bioRxiv*, 2020.
- 1109 [7] X. Wang, J. D. Dworkin, D. Zhou, J. Stiso, E. B. Falk, D. S. Bassett, P. Zurn, and D. M.  
1110 Lydon-Staley, “Gendered citation practices in the field of communication,” *Annals of the  
1111 International Communication Association*, 2021.
- 1112 [8] P. Chatterjee and R. M. Werner, “Gender disparity in citations in high- impact journal  
1113 articles,” *JAMA Netw Open*, vol. 4, no. 7, p. e2114509, 2021.
- 1114 [9] J. M. Fulvio, I. Akinola, and B. R. Postle, “Gender (im)balance in citation practices in  
1115 cognitive neuroscience,” *J Cogn Neurosci*, vol. 33, no. 1, pp. 3–7, 2021.
- 1116 [10] D. Zhou, M. A. Bertolero, J. Stiso, E. J. Cornblath, E. G. Teich, A. S. Blevins, Virtualmario,  
1117 C. Camp, J. D. Dworkin, and D. S. Bassett, “Gender diversity statement and code notebook  
1118 v1.1,” Oct. 2020.
- 1119 [11] Ambekar, A., Ward, C., Mohammed, J., Male, S., & Skiena, S. (2009, June). Name-  
1120 ethnicity classification from open sources. In *Proceedings of the 15th ACM SIGKDD  
1121 international conference on Knowledge Discovery and Data Mining* (pp. 49-58).

1122 [12] Sood, G., & Laohaprapanon, S. (2018). Predicting race and ethnicity from the sequence of  
1123 characters in a name. arXiv preprint arXiv:1805.02109.

## 1124 **Acknowledgements**

1125 We are grateful to Dr. Bianca De Blasi, Dr. Eli J. Cornblath, Dr. Matthew Cieslak, Dr.  
1126 Pragma Srivastava, Dr. Richard F. Betzel, Dr. Urs Braun, and Dr. Zaixu Cui for useful  
1127 discussions. D.S.B. acknowledges support from the Swartz Foundation, the Paul Allen  
1128 Foundation, the Army Research Office (Bassett-W911NF-14-1-0679, Grafton-W911NF-16-1-  
1129 0474), the National Institute of Mental Health (2-R01-DC-009209-11, R01-MH112847, R01-  
1130 MH107235, R21-MH-106799), National Institute of Neurological Disorders and Stroke (R01-  
1131 NS099348), and the National Science Foundation (BCS-1631550 and IIS-1926757). X.H.  
1132 acknowledges support from the Research Start-up Fund of USTC. LC acknowledges support  
1133 from a Berkeley Fellowship, jointly awarded by University College London and Gonville and  
1134 Caius College, Cambridge. LP was supported by the National Institute of Mental Health of the  
1135 National Institutes of Health under Award Number K99MH127296 and a 2020 NARSAD Young  
1136 Investigator Grant from the Brain & Behavior Research Foundation. J.I.T. acknowledges support  
1137 from the National Institute of Mental Health (R01-MH104606) and National Institute of  
1138 Neurological Disorders and Stroke (R01-NS112816-01). M.R.S. acknowledges support from the  
1139 NIH and DARPA. J.Z.K. acknowledges support from the NSF Graduate Research Fellowship  
1140 No. DGE-1321851. The content is solely the responsibility of the authors and does not  
1141 necessarily represent the official views of any of the funding agencies.

## 1142 **Author contributions**

1143 X.H. and D.S.B. designed the study. X.H. performed all analyses and wrote the initial draft  
1144 of the manuscript. L.C. and L.P. contributed to the drafting and revising of the manuscript. J.S.  
1145 and T.M.K. contributed to the analytical code. J.Z.K., Z.L., T.M., and F.P. contributed analytic  
1146 solutions. M.R.S. and J.I.T. provided the clinical and imaging data. All authors edited the  
1147 manuscript and approved the final version.

## 1148 **Ethics declarations**

### 1149 ***Competing interests***

1150 M.R.S has research contracts through Thomas Jefferson University with UCB Pharma,  
1151 Eisai, Medtronic, Takeda, SK Life Science, Neurelis, Engage Therapeutics, Xenon, and Cavion,  
1152 and has consulted for Medtronic and NeurologyLive. T.M.K. is a full-time employee of F.  
1153 Hoffmann-La Roche Ltd. and holds stock options from F. HoffmannLa Roche Ltd. The  
1154 remaining authors declare no competing interests.
